# Supplementary material for: Facile rotation around a silicon–phosphorus double bond enabled through coordination to tungsten
Source: Royal Society of Chemistry journal article supplement (doi:10.1039/c5cc04247j), 2015-01-01
Supplement: c5cc04247j1.pdf [file c5cc04247j1.pdf]

## Supporting Information

# Facile Rotation around a Silicon-Phosphorus Double Bond Enabled through Coordination to Tungsten

Nora C. Breit,<sup>a</sup> Tibor Szilvási,<sup>b</sup> Shigeyoshi Inoue<sup>\*a</sup>

<sup>a</sup>Institut für Chemie, Technische Universität Berlin, Straße des 17. Juni 135, Sekr. C2, D-10623 Berlin, Germany

<sup>b</sup>Department of Inorganic and Analytical Chemistry, Budapest University of Technology and Economics, Szent Gellért tér 4, 1111 Budapest, Hungary

### Contents

|                                                                                              |     |
|----------------------------------------------------------------------------------------------|-----|
| 1. Experimental Details.....                                                                 | S2  |
| 1.1 General Considerations.....                                                              | S2  |
| 1.2 Synthesis of <b>2</b> .....                                                              | S3  |
| 1.3 Synthesis of <b>3</b> .....                                                              | S4  |
| 2. Spectral Data of Compounds <b>1</b> , <b>2</b> and <b>3</b> .....                         | S5  |
| 2.1 NMR Spectra of <b>1</b> at Variable Temperatures.....                                    | S5  |
| 2.2 NMR Spectra of <b>2</b> at Room Temperature in C <sub>6</sub> D <sub>6</sub> .....       | S7  |
| 2.3 NMR Spectra of <b>2</b> at Variable Temperatures in Toluene- <i>d</i> <sub>8</sub> ..... | S9  |
| 2.4 Solid State NMR Spectra of <b>2</b> .....                                                | S12 |
| 2.5 NMR Spectra of <b>3</b> .....                                                            | S13 |
| 2.6 IR Spectra of <b>2</b> and <b>3</b> .....                                                | S15 |
| 2.7 UV/Vis Spectrum of <b>2</b> .....                                                        | S16 |
| 3. Data from Single-Crystal X-ray Structure Determinations of <b>2</b> and <b>3</b> .....    | S17 |
| 4. Additional Results of Computational Investigations.....                                   | S21 |
| 4.1 The Transition State with a 0° Torsion Angle.....                                        | S21 |
| 4.2 Description and Depiction of the MOs of ( <i>E</i> )- <b>2</b> .....                     | S21 |
| 4.3 Mechanism for the Formation of <b>3</b> from <b>2</b> .....                              | S23 |
| 5. Computational Details.....                                                                | S24 |
| 6. References.....                                                                           | S39 |

## 1 Experimental Details

### 1.1 General Considerations

All experiments and manipulations were carried out under dry oxygen-free atmosphere using standard Schlenk techniques or in an MBraun inert atmosphere dry box containing an atmosphere of purified nitrogen. Solvents were dried using an M Braun purification system and stored over 3 Å molecular sieves. Hexacarbonyltungsten (Merck, 98%) was sublimed prior to use. The starting materials, phosphasilene **1**<sup>1</sup> and phosphinosilylene **4**<sup>2</sup>, were prepared according to the literature. The deuterated solvents were degassed by freeze-pump-thaw technique and stored over 3 Å molecular sieves. The <sup>1</sup>H, <sup>13</sup>C{<sup>1</sup>H}, <sup>29</sup>Si{<sup>1</sup>H}, and <sup>31</sup>P{<sup>1</sup>H} spectra were recorded on Bruker Avance II 200 MHz, 400 MHz, Bruker Avance III 500 MHz and Bruker Avance 400 MHz Solid State Spectrometers. <sup>1</sup>H chemical shifts were referenced to the residual protons of C<sub>6</sub>D<sub>6</sub> at 7.15 ppm and the residual methyl-protons of toluene-*d*<sub>8</sub> at 2.14 ppm. <sup>13</sup>C chemical shifts were referenced to the carbon atoms of C<sub>6</sub>D<sub>6</sub> at 128.00 ppm and the methyl-carbons of toluene-*d*<sub>8</sub> at 20.4 ppm. The <sup>29</sup>Si{<sup>1</sup>H} NMR spectra were referenced to tetramethylsilane as an external standard and <sup>31</sup>P{<sup>1</sup>H} NMR spectra were externally calibrated with H<sub>3</sub>PO<sub>4</sub> in sealed capillaries. Melting points were determined from vacuum sealed capillaries on an electronic “Melting point tester” device from BSGT company and are uncorrected. For this purpose samples were sealed off in capillaries under vacuum and heated slowly to observed decomposition or melting. High resolution mass spectra were recorded on an Orbitrap LTQ XL of Thermo Scientific mass spectrometer. Elemental analysis was conducted on a Thermo Finnigan Flash EA 1112 series. IR spectra were recorded on a PerkinElmer Spectrum 100 FTIR. The UV/Vis spectrum was recorded with an Analytik Jena Specord S600 Spectrometer in 10 mm quartz cuvettes.

**Single-Crystal X-ray Structure Determinations.** Crystals were mounted on a glass capillary in perfluorinated oil and measured in a cold N<sub>2</sub> flow. The data of compounds **2** and **3** was collected on an Oxford Diffraction SuperNova at 150 K (Cu-K $\alpha$  radiation,  $\lambda = 1.5418$  Å). The structures were solved by direct methods or Patterson and refined on F2 with the SHELX-97<sup>3</sup> software package. The positions of the hydrogen atoms were calculated and considered isotropically according to a riding model.

## 1.2 Synthesis of **2**

**Preparation of LSi(TMS)P(TMS)(W{CO}<sub>5</sub>), **2**.** Three times a solution of W(CO)<sub>6</sub> (242 mg, 0.69 mmol) in thf (10 mL) was treated for two hours with UV-light to give W(CO)<sub>5</sub>·thf in situ. These solutions were subsequently added to a solution of **2** (300 mg, 0.69 mmol) in thf (10 mL) at -50 °C. The reaction mixture was stirred at r.t. for 16 h. Volatiles were removed under vacuum. The residue was washed with hexane (6 mL) and cooled to -30 °C, when the hexane solution was removed. The unreacted W(CO)<sub>6</sub> was removed by sublimation at 60 °C under vacuum. The resulting yellow solid is product **2** (482 mg, 92%). Single crystals of **2** were obtained from hexane at -28 °C.

Mp 147 °C (decomposition, presumably **3** formed before decomposition of **2**).

NMR data of **2** at 298 K: <sup>1</sup>H NMR (200.13 MHz, C<sub>6</sub>D<sub>6</sub>, 298 K): δ = 0.37 (s, 9 H, SiTMS), 0.60 (d, <sup>3</sup>J<sub>P-H</sub> = 5.3 Hz, 9 H, PTMS), 1.07 (s, 18 H, *t*Bu), 6.7-7.1 (m, 4 H, Ph), 7.50 (m, 1 H, Ph) ppm. <sup>13</sup>C{<sup>1</sup>H} NMR (125.76 MHz, C<sub>6</sub>D<sub>6</sub>, 298 K): δ = 0.9 (SiTMS), 6.4 (d, <sup>2</sup>J<sub>C-P</sub> = 12.5 Hz, PTMS), 31.8 (CMe<sub>3</sub>), 55.6 (CMe<sub>3</sub>), 128.5, 128.6, 130.7, 130.9 (Ph), 201.0 (CO) ppm. <sup>29</sup>Si{<sup>1</sup>H} NMR (DEPT, J = 5 Hz, 79.49 MHz, C<sub>6</sub>D<sub>6</sub>, 298 K): δ = -13.1 (d, <sup>2</sup>J<sub>Si-P</sub> = 9.0 Hz, SiTMS), 8.8 (d, <sup>1</sup>J<sub>Si-P</sub> = 15.8 Hz, PTMS) ppm.

NMR data of (*E*)-**2**: <sup>1</sup>H NMR (500.25 MHz, toluene-*d*<sub>8</sub>, 213 K): δ = 0.40 (s, 9 H, SiTMS), 0.67 (d, <sup>3</sup>J<sub>P-H</sub> = 5.2 Hz, 9 H, PTMS), 1.13 (s, 18 H, *t*Bu), 6.8-7.2 (m, 4 H, Ph, overlapping with toluene-*d*<sub>8</sub>), 7.62 (m, 1 H, Ph) ppm. <sup>13</sup>C{<sup>1</sup>H} NMR (125.79 MHz, toluene-*d*<sub>8</sub>, 213 K): δ = 0.5 (SiTMS), 6.5 (d, <sup>2</sup>J<sub>C-P</sub> = 12.3 Hz, PTMS), 31.3 (CMe<sub>3</sub>), 55.2 (CMe<sub>3</sub>), 172.3 (NCN), 201.0 (CO) ppm. <sup>29</sup>Si{<sup>1</sup>H} NMR (99.39 MHz, toluene-*d*<sub>8</sub>, 213 K): δ = -12.8 (s, SiTMS), 8.9 (d, <sup>1</sup>J<sub>P-Si</sub> = 15.7 Hz, PTMS), 49.8 (d, <sup>1</sup>J<sub>Si-P</sub> = 106 Hz, Si=P) ppm. <sup>31</sup>P{<sup>1</sup>H} NMR (202.50 MHz, toluene-*d*<sub>8</sub>, 213 K): δ = -282.0 (s with satellite: <sup>1</sup>J<sub>P-W</sub> = 123 Hz) ppm.

NMR data of (*Z*)-**2**: <sup>1</sup>H NMR (500.25 MHz, toluene-*d*<sub>8</sub>, 213 K): δ = 0.55 (s, 9 H, SiTMS), 0.75 (d, <sup>3</sup>J<sub>P-H</sub> = 5.2 Hz, 9H, PTMS), 1.01 (s, 18 H, *t*Bu), 6.8-7.2 (m, 4 H, Ph, overlapping with toluene-*d*<sub>8</sub>), 7.21 (m, 1 H, Ph) ppm. <sup>13</sup>C{<sup>1</sup>H} NMR (125.79 MHz, toluene-*d*<sub>8</sub>, 213 K): 0.3 (SiTMS), 5.5 (d, <sup>2</sup>J<sub>C-P</sub> = 11.0 Hz, PTMS), 31.4 (CMe<sub>3</sub>), 55.2 (CMe<sub>3</sub>), 172.3 (NCN), 200.3 (CO) ppm. <sup>29</sup>Si{<sup>1</sup>H} NMR (99.39 MHz, toluene-*d*<sub>8</sub>, 213 K): δ = -13.3 (SiTMS), 8.4 (d, <sup>1</sup>J<sub>Si-P</sub> = 18.8 Hz, PTMS), 45.9 (d, <sup>1</sup>J<sub>Si-P</sub> = 106 Hz, Si=P) ppm. <sup>31</sup>P{<sup>1</sup>H} NMR (202.50 MHz, toluene-*d*<sub>8</sub>, 213 K): δ = -304.3 (s with satellite: <sup>1</sup>J<sub>P-W</sub> = 128 Hz) ppm.

Solid state NMR data of **2**: <sup>29</sup>Si{<sup>1</sup>H} NMR (79.44 MHz, 298 K): δ = -14.1 (SiTMS), 5.9 (PTMS), 47.7 (d, <sup>1</sup>J<sub>Si-P</sub> = 97.6 Hz, Si=P) ppm. <sup>31</sup>P{<sup>1</sup>H} NMR (161.87 MHz, 298 K): δ = -279.3 ppm.

UV/Vis(hexane):  $\lambda_{\max}$  ( $\epsilon$ ) = 354 nm (5800 L mol<sup>-1</sup> cm<sup>-1</sup>). IR (KBr):  $\nu$  = 2054 (CO), 1916 (s, CO), 1904 (CO), 1872 (CO) cm<sup>-1</sup>. HRMS (APCI, toluene,  $m/z$ ): calculated for C<sub>25</sub>H<sub>41</sub>N<sub>2</sub>O<sub>4</sub>PSi<sub>3</sub>W [MH<sup>+</sup>-CO]: 733.1694, found: 733.1682. Elemental analysis calcd. for C<sub>26</sub>H<sub>41</sub>N<sub>2</sub>O<sub>5</sub>PSi<sub>3</sub>W: C 41.05, H 5.43, N 3.68; found: C 40.16, H 5.26, N 3.42.

Note: The <sup>13</sup>C{<sup>1</sup>H} NMR signals of the phenyl-carbon atoms could not be assigned based on the strong overlap with the toluene-*d*<sub>8</sub> carbon signals. Presumably the excess tungsten carbonyl was only needed, because with the set up of our UV lamp did not achieve a quantitative formation of W(CO)<sub>5</sub>·thf from W(CO)<sub>6</sub>.

### 1.3 Synthesis of **3**

**Preparation of LSi(W{CO}<sub>5</sub>)P(TMS)<sub>2</sub>, **3**.** Hexane (20 mL) was added to LSiCl (302 mg, 1.02 mmol) and LiP(TMS)<sub>2</sub>·dimethoxyethane (289 mg, 1.04 mmol) at 0 °C. The reaction mixture was stirred for 1.5 h at r.t. and the solution was filtered. A solution of W(CO)<sub>6</sub> (352 mg, 1.00 mmol) in thf (15 mL) was treated for 2 h with UV light. The resulting W(CO)<sub>5</sub>·thf solution was added to the first solution at -40 °C. After 30 min, the cold bath was removed and the reaction mixture was stirred at r.t. for 30 min. Volatiles were removed under vacuum. The product was extracted with hexane (20 mL) and the amount of solvent was reduced under vacuum. At -28 °C a light yellow colored solid of **3** (219 mg, 29%) was obtained. Single crystals of **3** were grown from hexane at -28 °C.

Mp 147-148 °C (decomposition). <sup>1</sup>H NMR (200.13 MHz, C<sub>6</sub>D<sub>6</sub>, 298 K):  $\delta$  = 0.51 (d, <sup>3</sup>J<sub>P-H</sub> = 4.2 Hz, 18 H, TMS) 1.23 (s, 18 H, *t*Bu), 6.8-7.0 (m, 3 H, Ph), 7.2-7.5 (m, 2 H, Ph) ppm. <sup>13</sup>C NMR (100.61 MHz, C<sub>6</sub>D<sub>6</sub>, 298 K):  $\delta$  = 5.3 (d, <sup>2</sup>J<sub>C-P</sub> = 11.5 Hz, TMS), 31.5 (CMe<sub>3</sub>), 55.5 (CMe<sub>3</sub>), 130.4, 130.5, 131.9 (Ar), 167.1 (NCN), 202.0 (CO) ppm. <sup>29</sup>Si{<sup>1</sup>H} NMR (79.49 MHz, C<sub>6</sub>D<sub>6</sub>, 298 K):  $\delta$  = 4.1 (d, <sup>1</sup>J<sub>Si-P</sub> = 21.5 Hz, TMS), 70.7 (d, <sup>1</sup>J<sub>P-Si</sub> = 134 Hz, satellite <sup>1</sup>J<sub>Si-W</sub> = 137 Hz, LSi) ppm. <sup>31</sup>P NMR (161.97 MHz, C<sub>6</sub>D<sub>6</sub>, 298 K):  $\delta$  = -199.4 (s with satellites: <sup>2</sup>J<sub>P-W</sub> = 23 Hz, <sup>1</sup>J<sub>P-Si</sub> = 134 Hz) ppm. IR (KBr):  $\nu$  = 2054 (s, CO), 1918 (s, CO), 1905 (shoulder, CO) cm<sup>-1</sup>. HRMS (APCI, toluene,  $m/z$ ): calcd for C<sub>26</sub>H<sub>42</sub>N<sub>2</sub>O<sub>5</sub>PSi<sub>3</sub>W<sup>+</sup> (MH<sup>+</sup>), 761.1643; found, 761.1664. Elemental analysis calcd. for C<sub>26</sub>H<sub>41</sub>N<sub>2</sub>O<sub>5</sub>PSi<sub>3</sub>W: C 41.05, H 5.43, N 3.68; found: C 41.06, H 5.37, N 3.53.

## 2. Spectral Data of Compounds 1, 2 and 3

### 2.1 NMR Spectra of 1 at Variable Temperatures

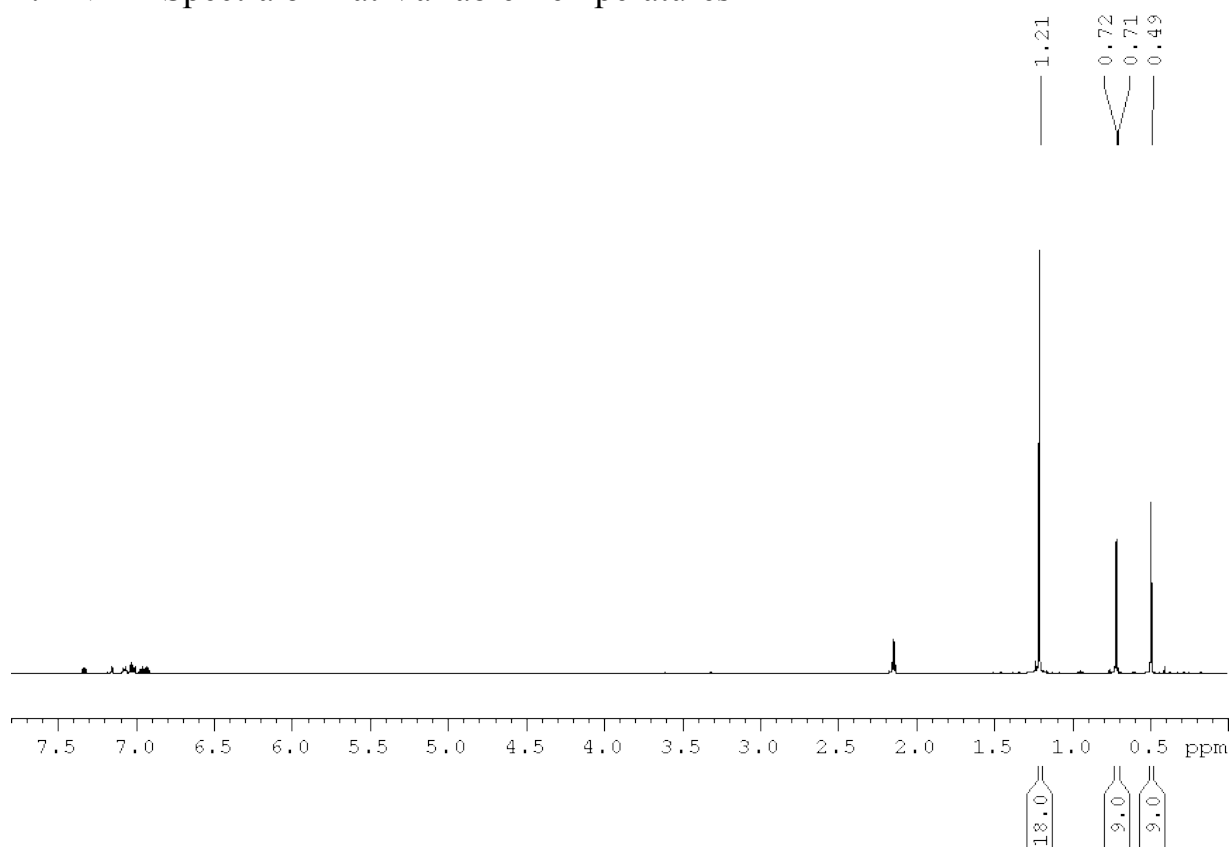

**Figure S1.** <sup>1</sup>H NMR spectrum of compound 1 in toluene-*d*<sub>8</sub> at r.t.

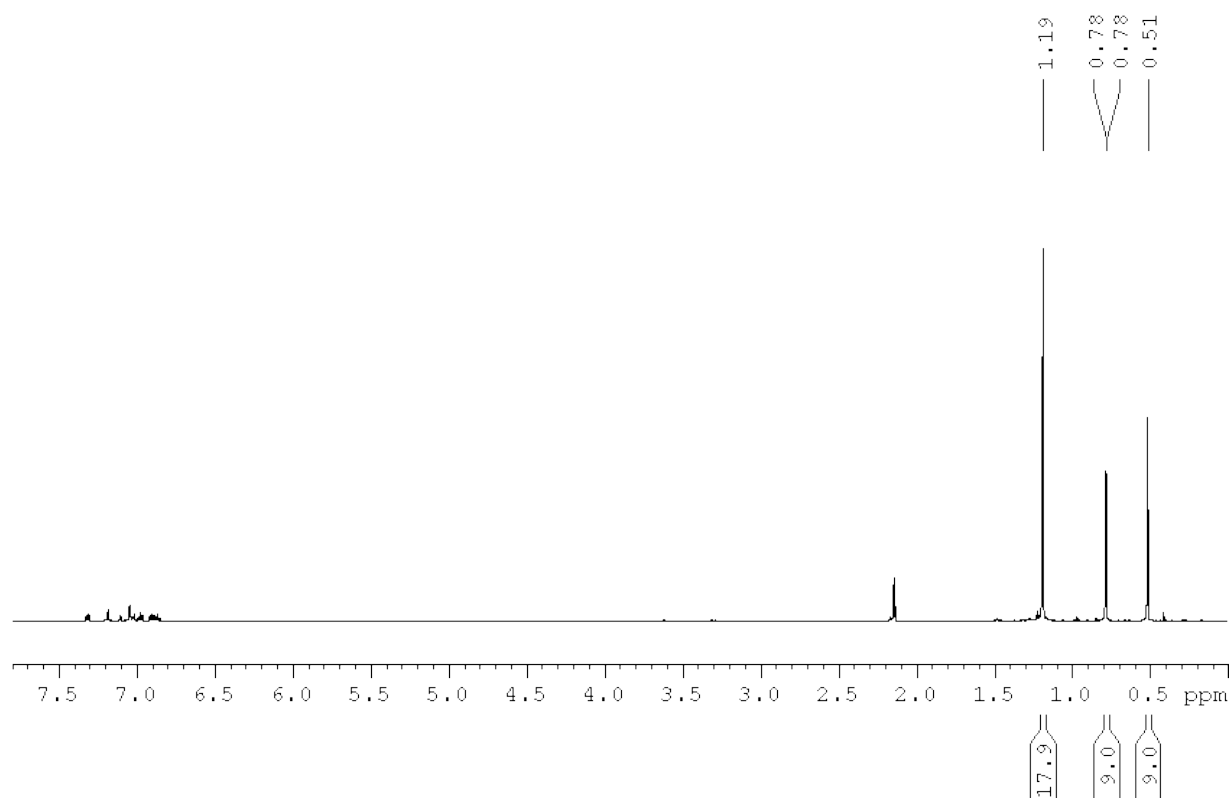

**Figure S2.** <sup>1</sup>H NMR spectrum of compound 1 in toluene-*d*<sub>8</sub> at -20 °C.

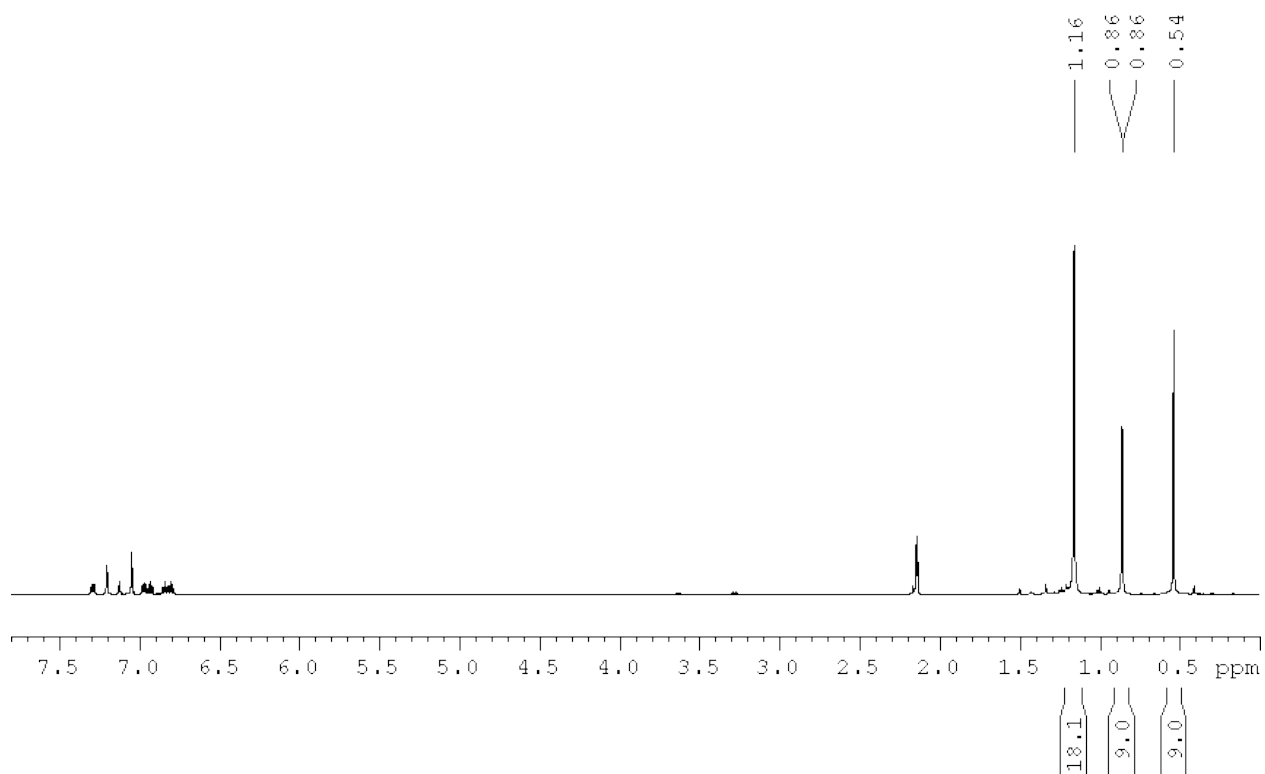

**Figure S3.**  $^1\text{H}$  NMR spectrum of compound **1** in  $\text{toluene-}d_8$  at  $-60\text{ }^\circ\text{C}$ .

2.2 NMR Spectra of **2** at Room Temperature in C<sub>6</sub>D<sub>6</sub>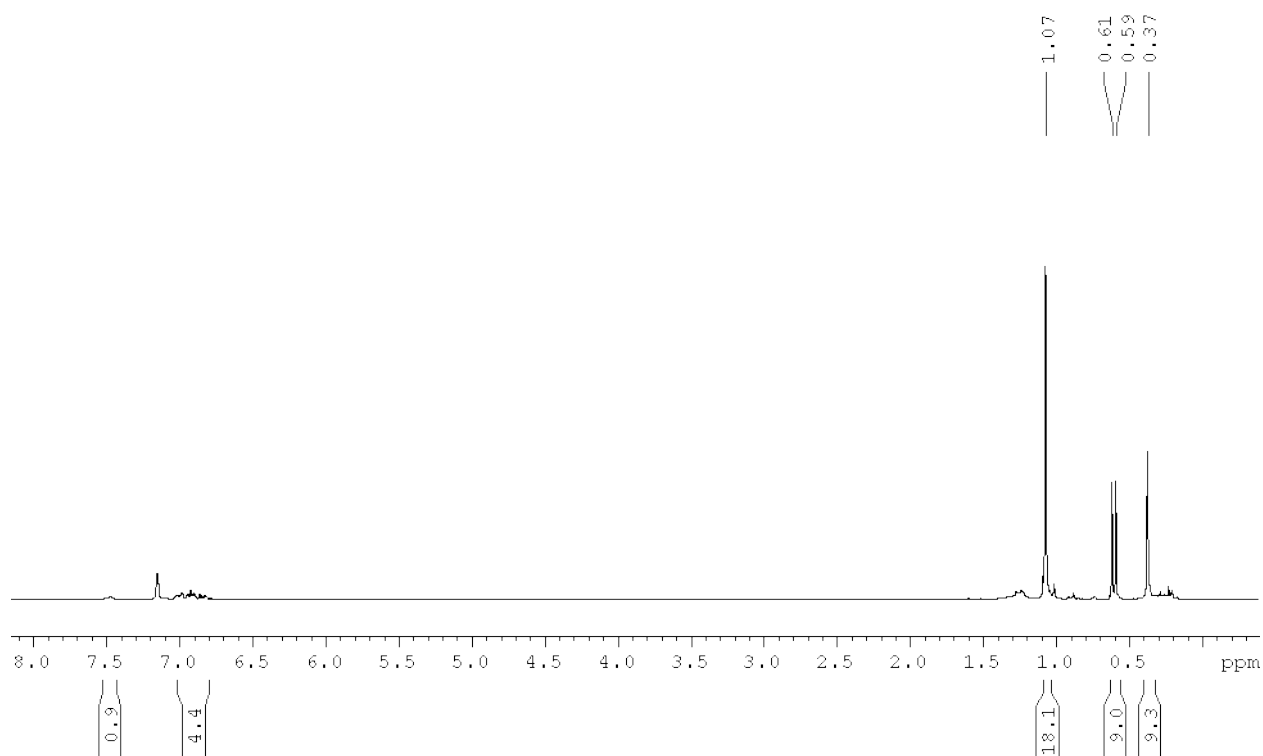**Figure S4.** <sup>1</sup>H NMR spectrum of compound **2** in C<sub>6</sub>D<sub>6</sub> at r.t.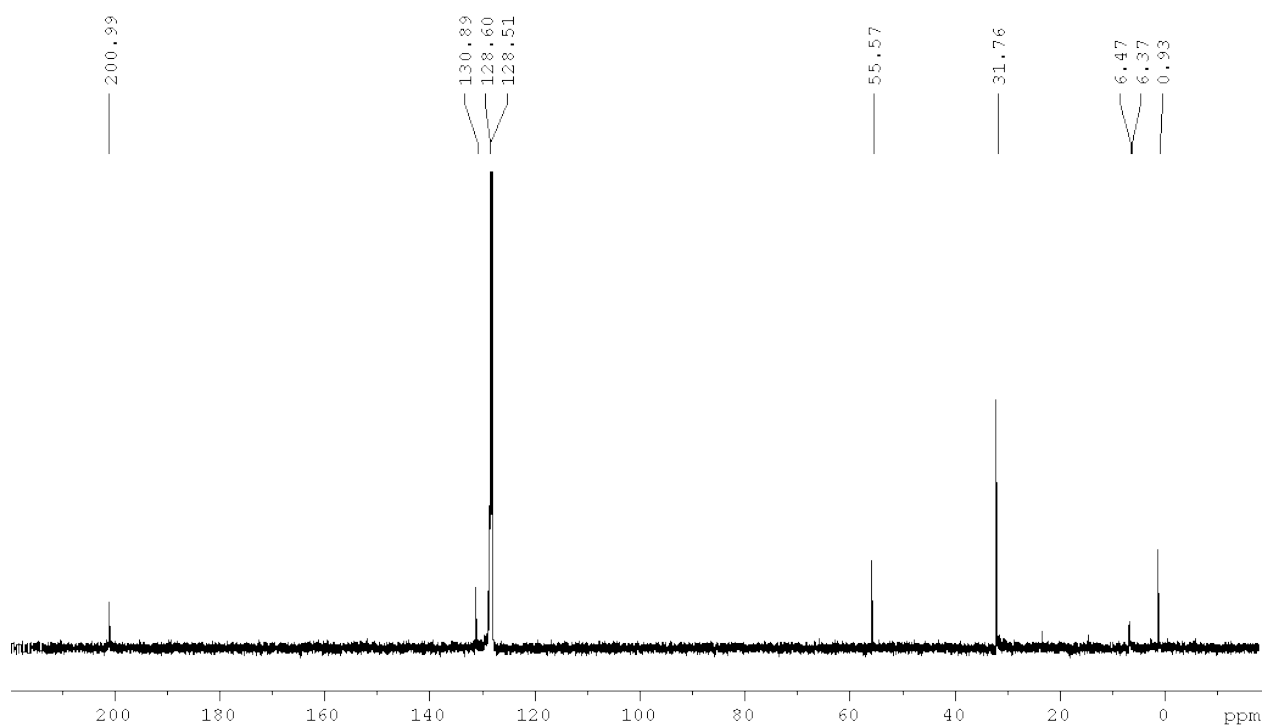**Figure S5.** <sup>13</sup>C{<sup>1</sup>H} NMR spectrum of compound **2** in C<sub>6</sub>D<sub>6</sub> at r.t.

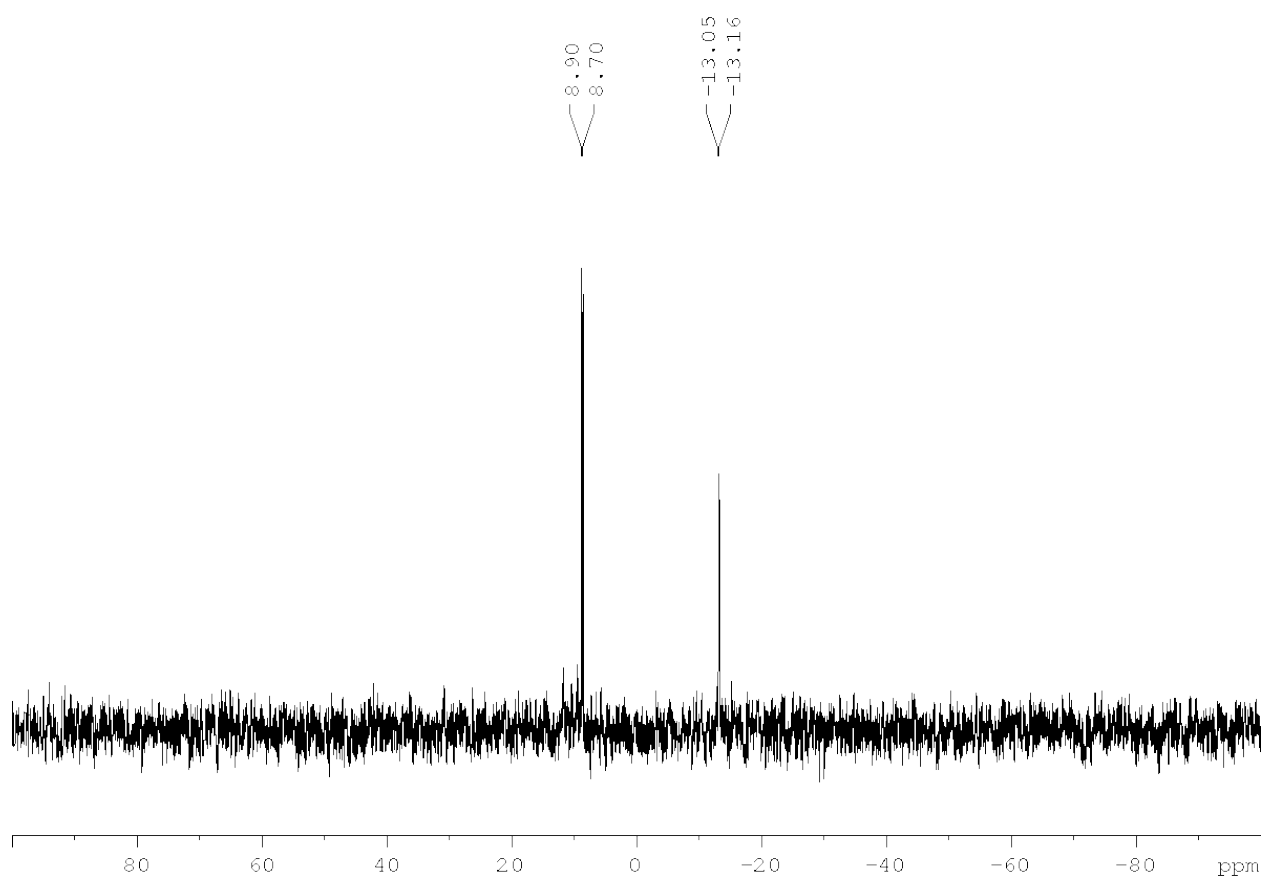

**Figure S6.**  $^{29}\text{Si}\{^1\text{H}\}$  DEPT spectrum of **2** in  $\text{C}_6\text{D}_6$  at r.t.



2.3 NMR Spectra of **2** at Variable Temperatures in Toluene- $d_8$ 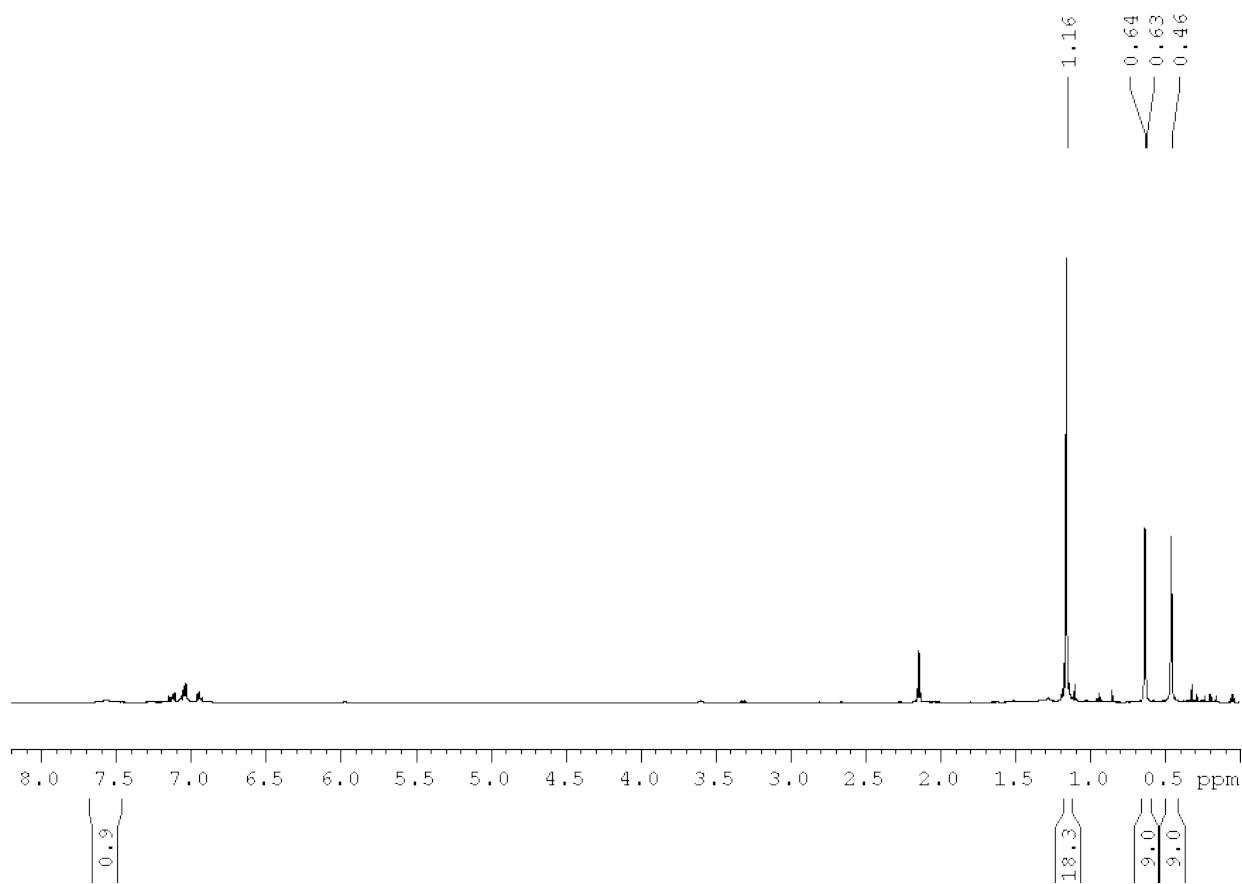**Figure S7.**  $^1\text{H}$  NMR spectrum of **2** in toluene- $d_8$  at r.t..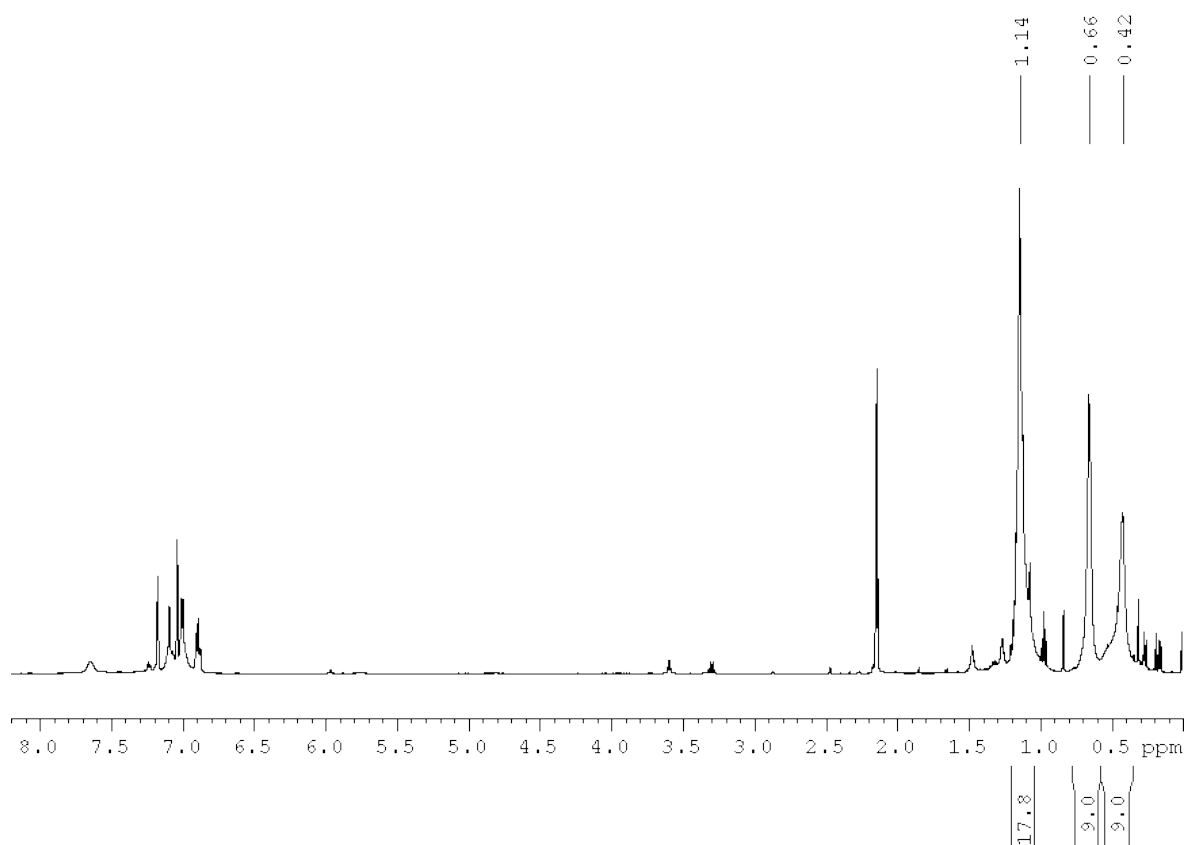**Figure S8.**  $^1\text{H}$  NMR spectrum of **2** in toluene- $d_8$  at  $-20\text{ }^\circ\text{C}$

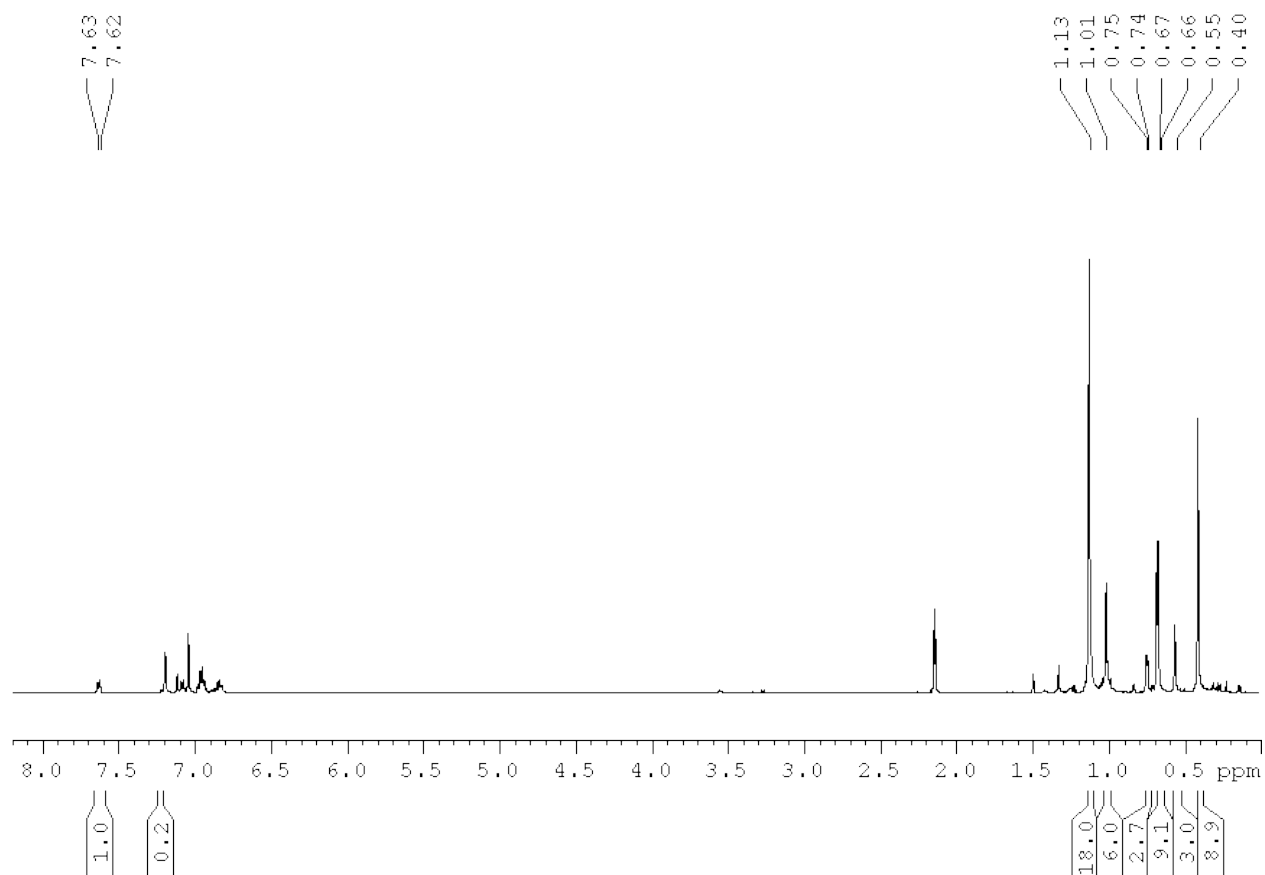

**Figure S9.**  $^1\text{H}$  NMR spectrum of **2** in toluene- $d_8$  at  $-60\text{ }^\circ\text{C}$ .

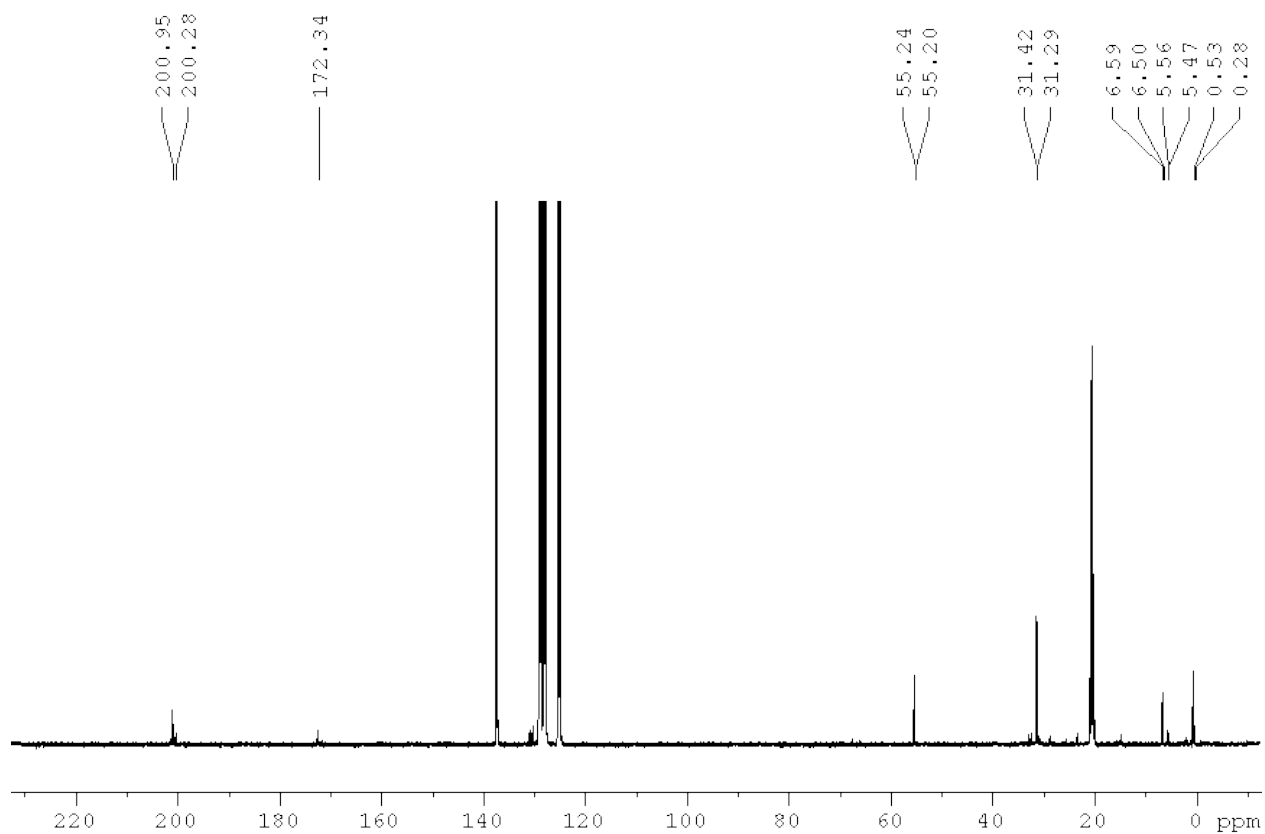

**Figure S10.**  $^{13}\text{C}\{^1\text{H}\}$  NMR spectrum of **2** in toluene- $d_8$  at  $-60\text{ }^\circ\text{C}$ .

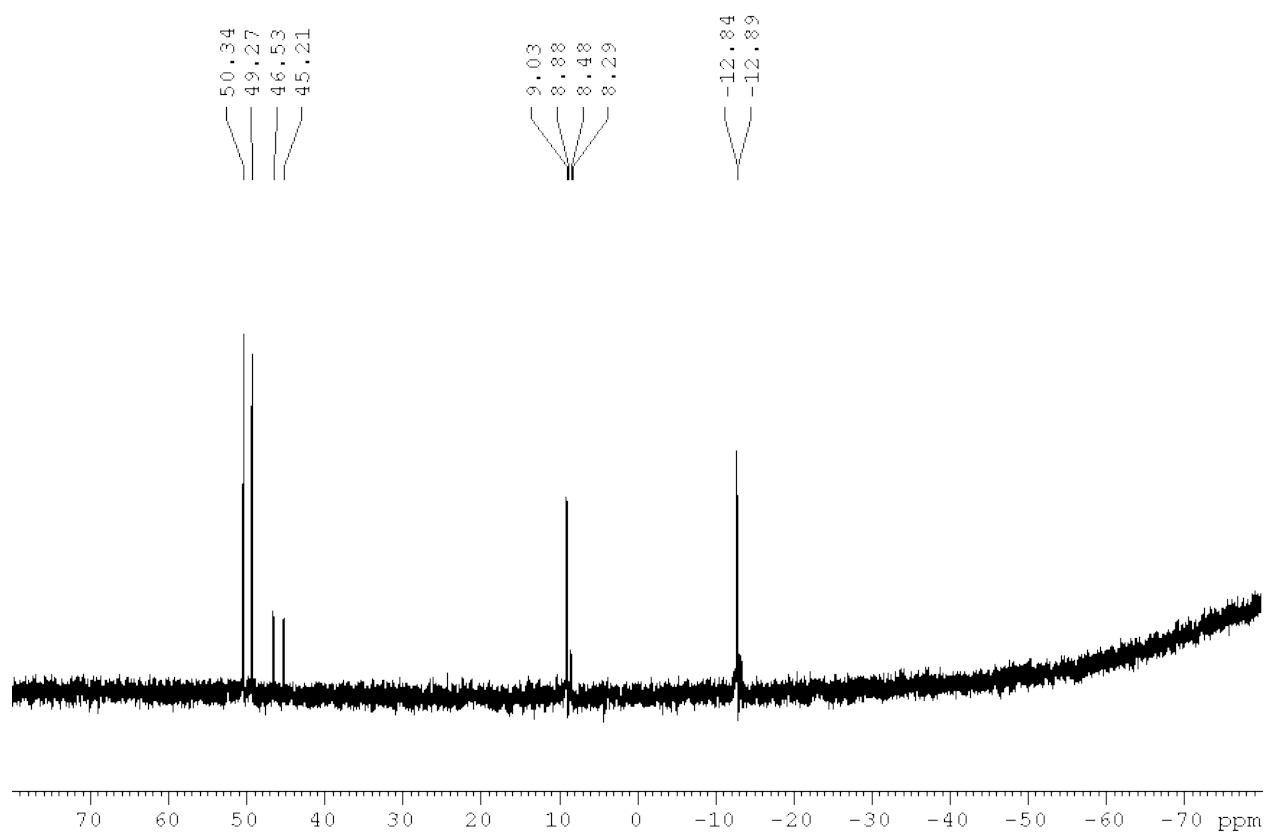

**Figure S11.**  $^{29}\text{Si}\{^1\text{H}\}$  NMR spectrum of **2** in toluene- $d_8$  at  $-60\text{ }^\circ\text{C}$

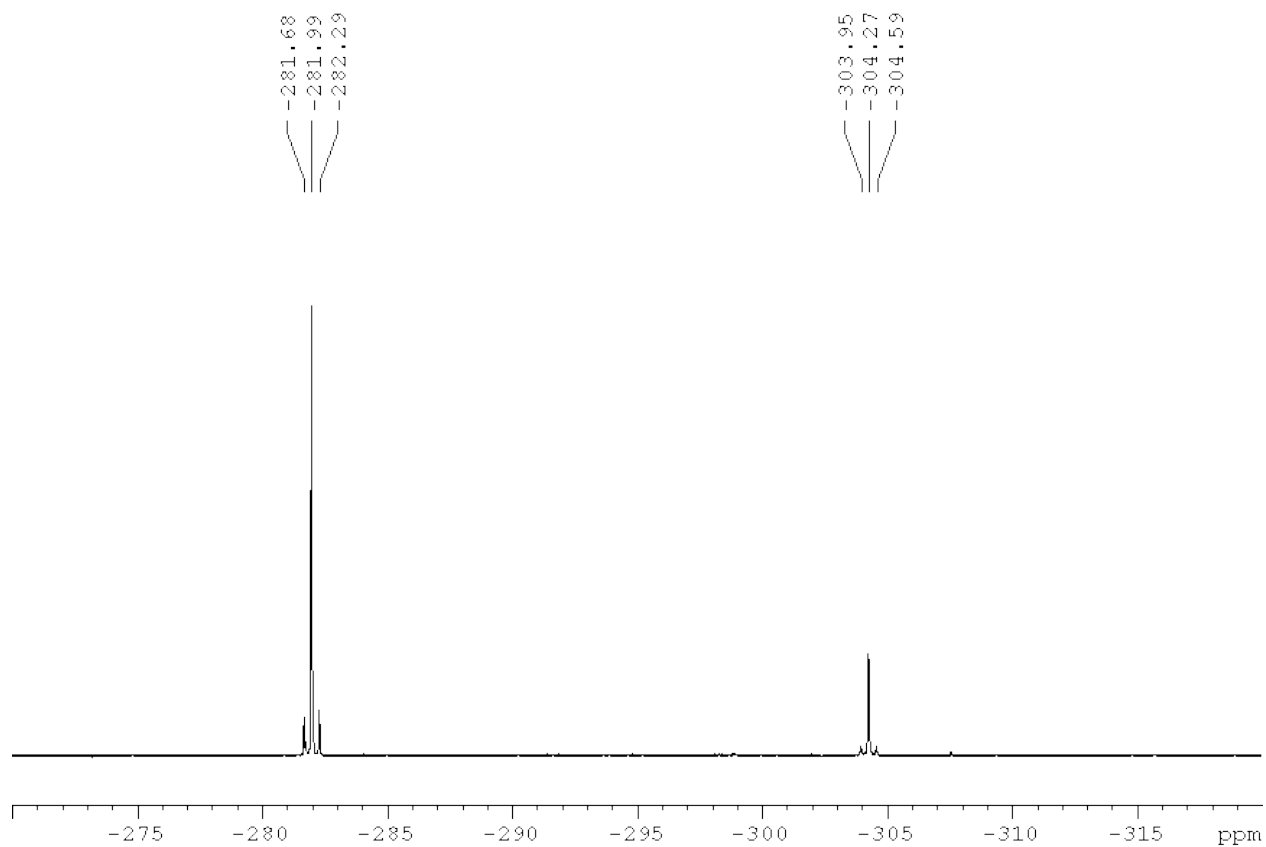

**Figure S12.**  $^{31}\text{P}\{^1\text{H}\}$  NMR spectrum of **2** in toluene- $d_8$  at  $-60\text{ }^\circ\text{C}$ .

2.4 Solid State NMR Spectra of **2**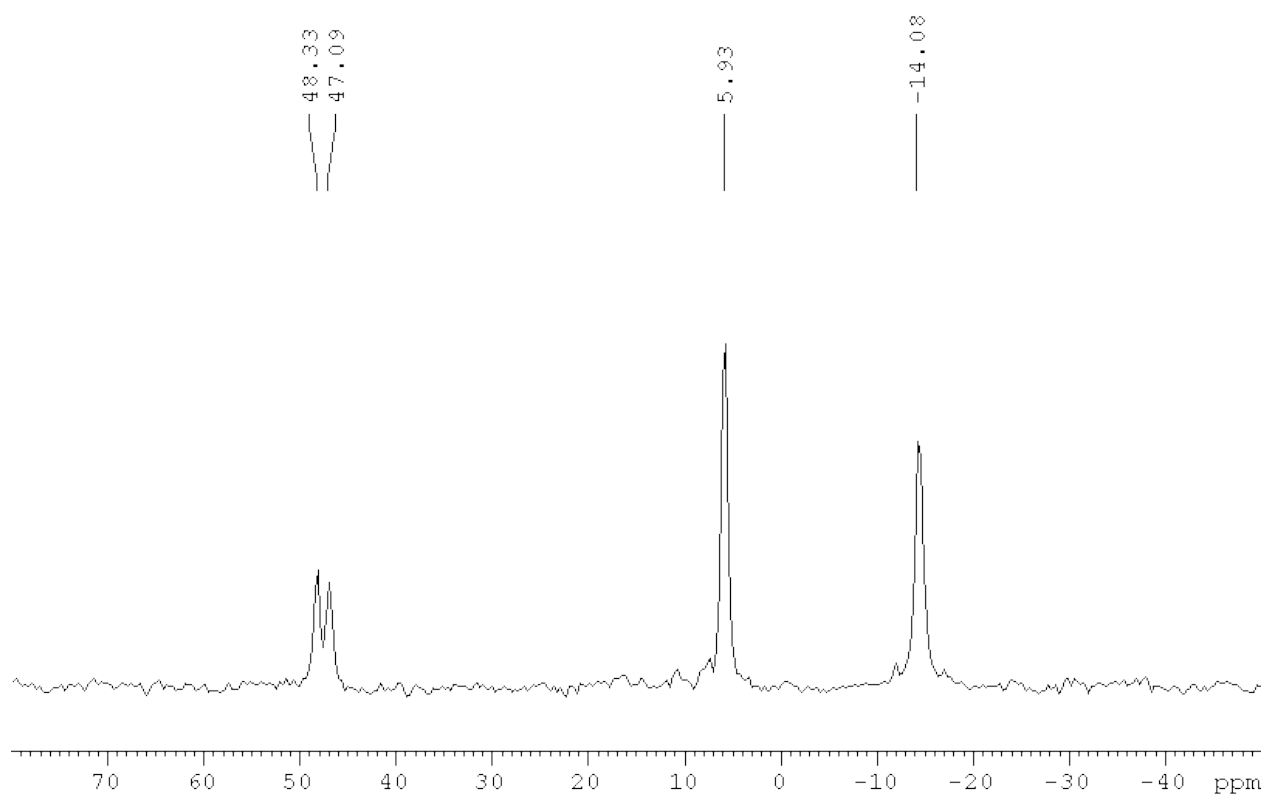**Figure S13.** Solid state  $^{29}\text{Si}\{^1\text{H}\}$  NMR spectrum of compound **2**.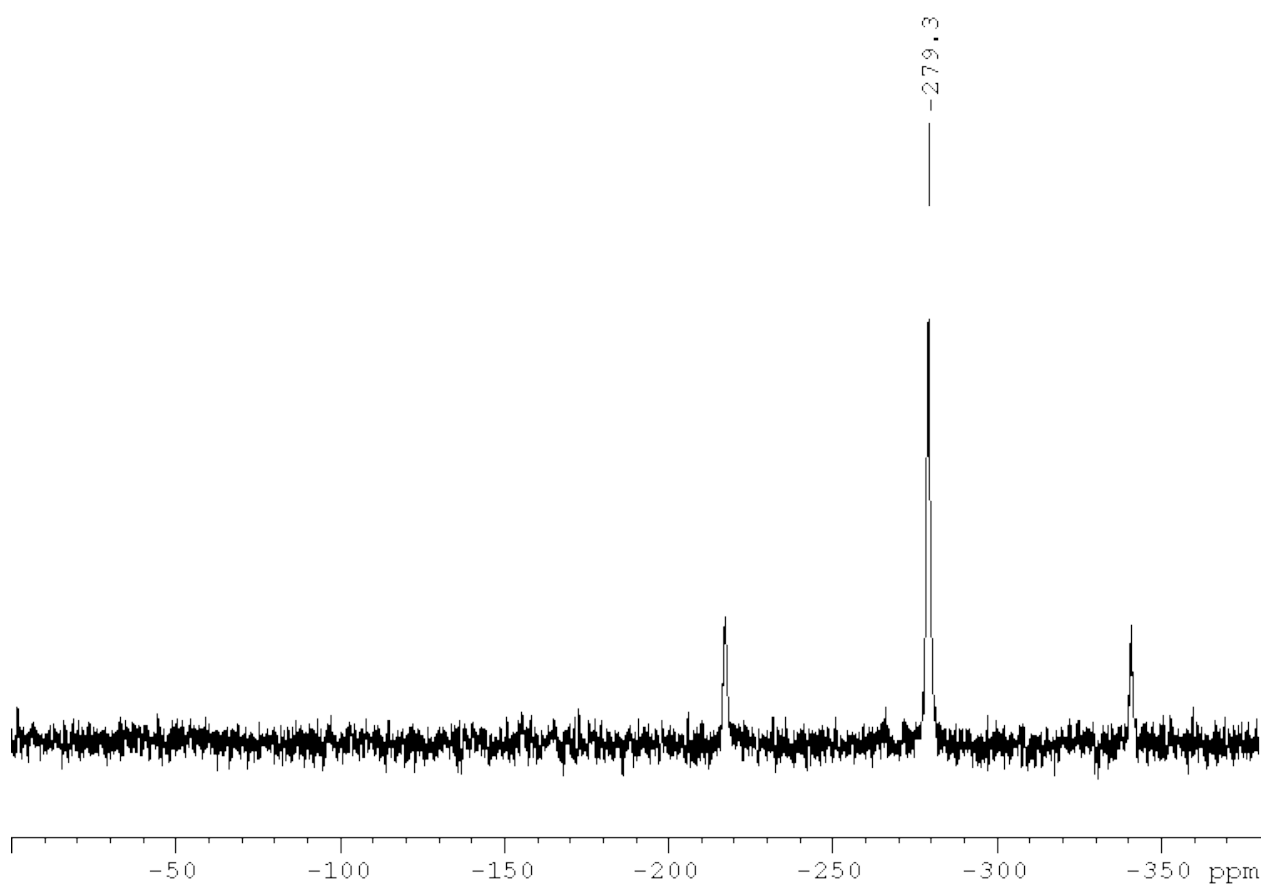**Figure S14.** Solid state  $^{31}\text{P}\{^1\text{H}\}$  NMR spectrum of compound **2**.

2.5 NMR Spectra of **3**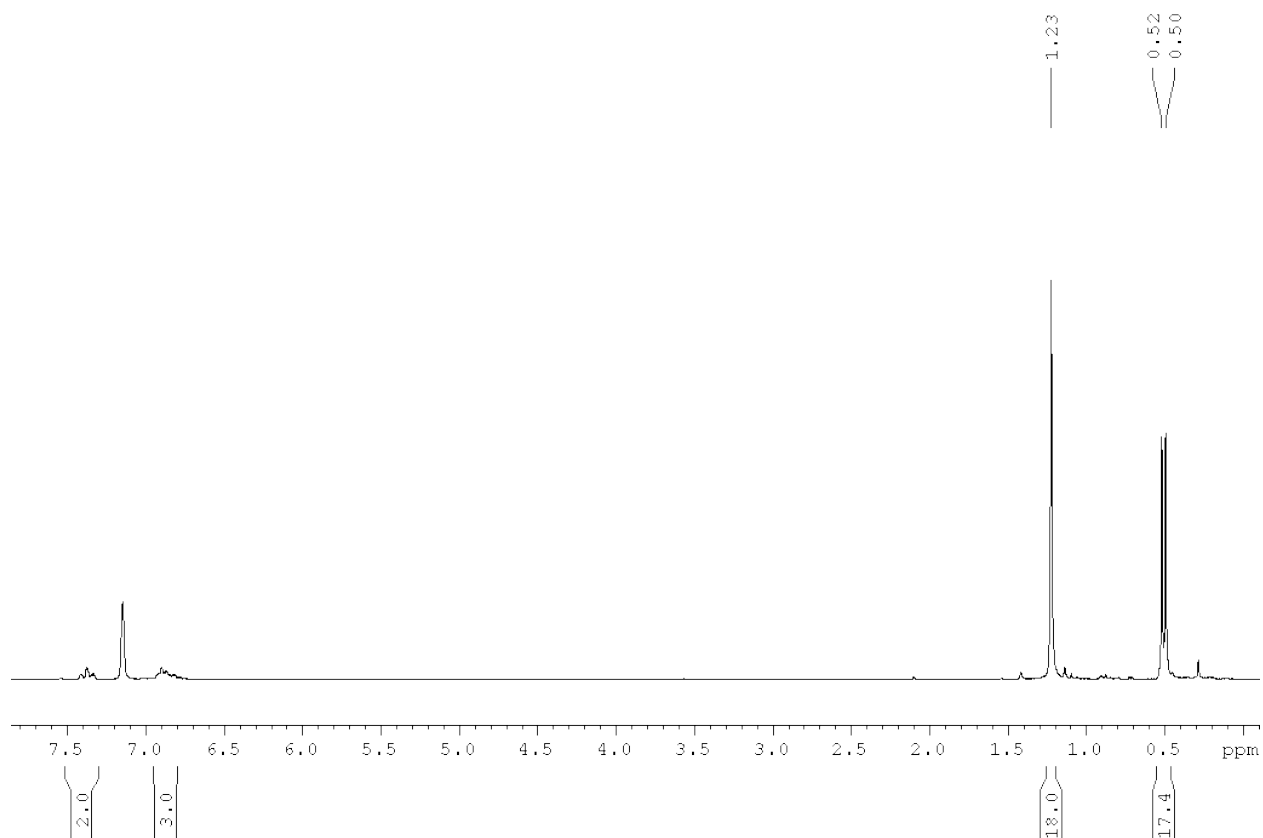**Figure S15.**  $^1\text{H}$  NMR spectrum of compound **3** in  $\text{C}_6\text{D}_6$ .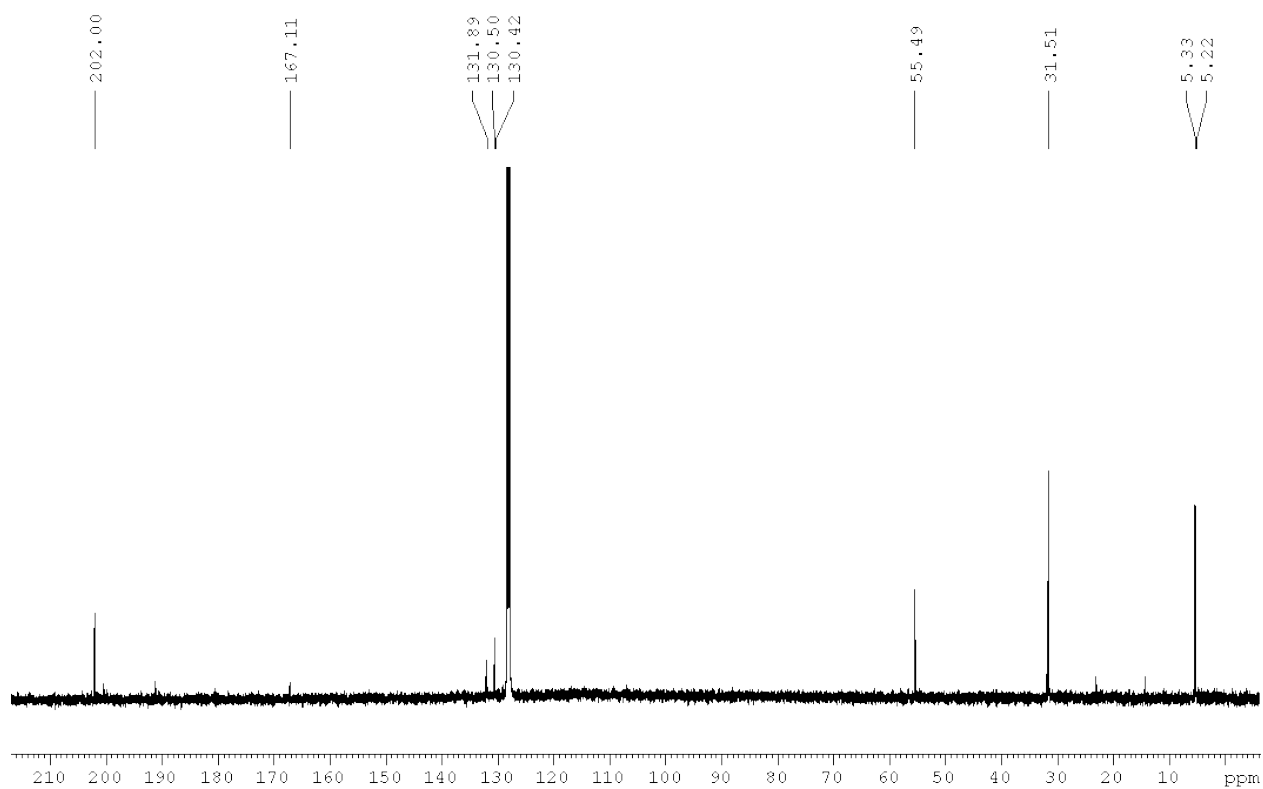**Figure S16.**  $^{13}\text{C}\{^1\text{H}\}$  NMR spectrum for compound **3** in  $\text{C}_6\text{D}_6$ .

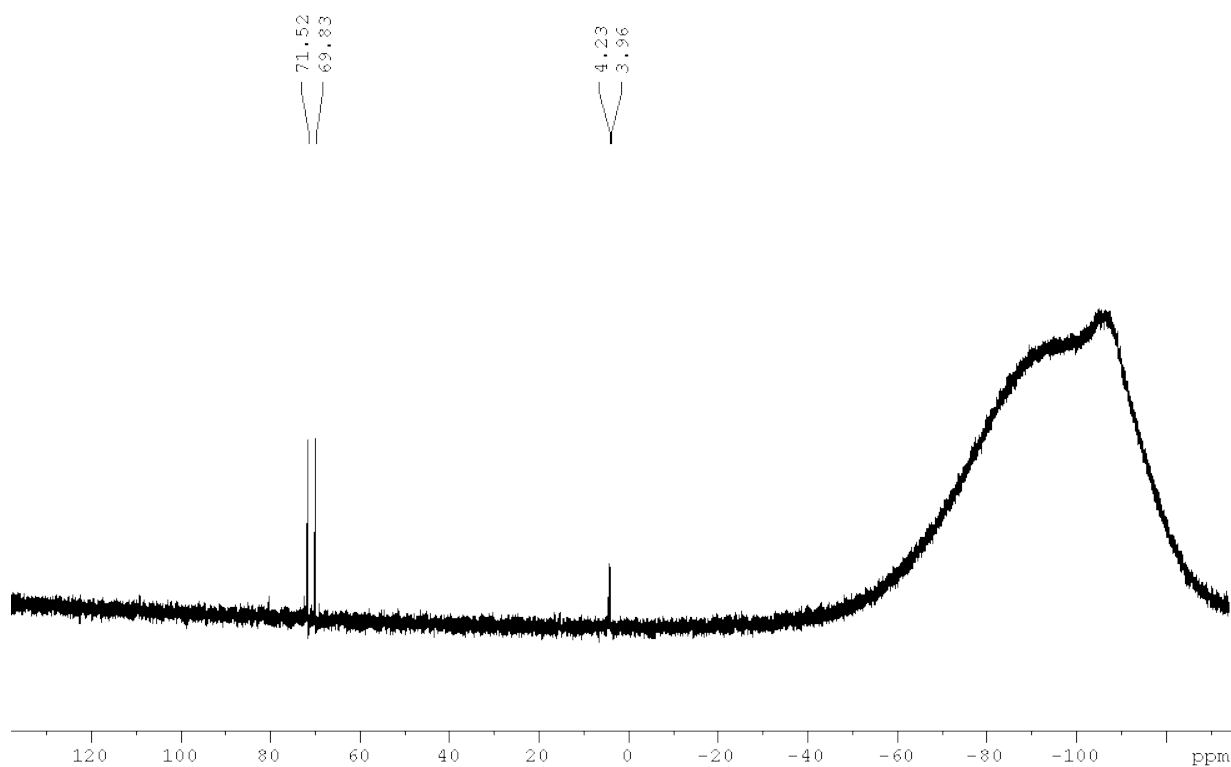

**Figure S17.**  $^{29}\text{Si}\{^1\text{H}\}$  NMR spectrum for compound **3** in  $\text{C}_6\text{D}_6$ .

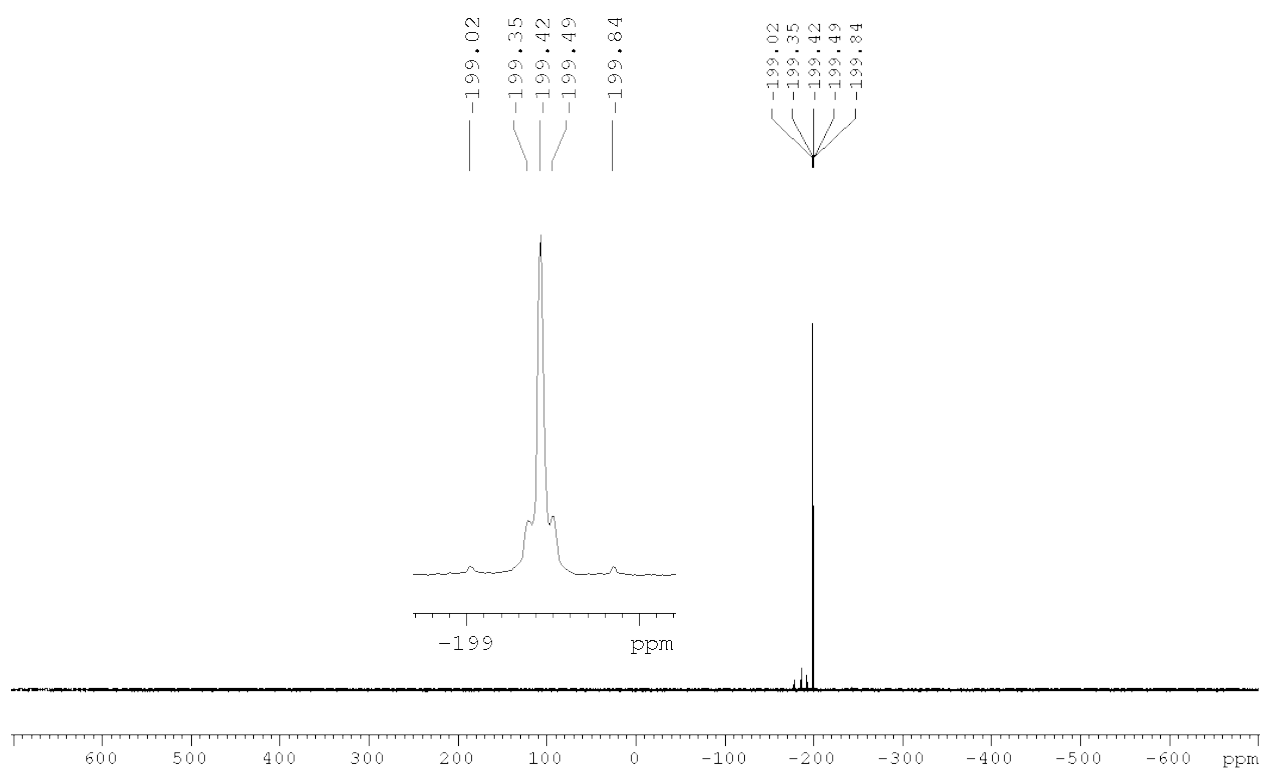

**Figure S18.**  $^{31}\text{P}\{^1\text{H}\}$  NMR spectrum for compound **3** in  $\text{C}_6\text{D}_6$  with a detail of the tungsten satellites.

2.6 IR spectra of compounds **2** and **3**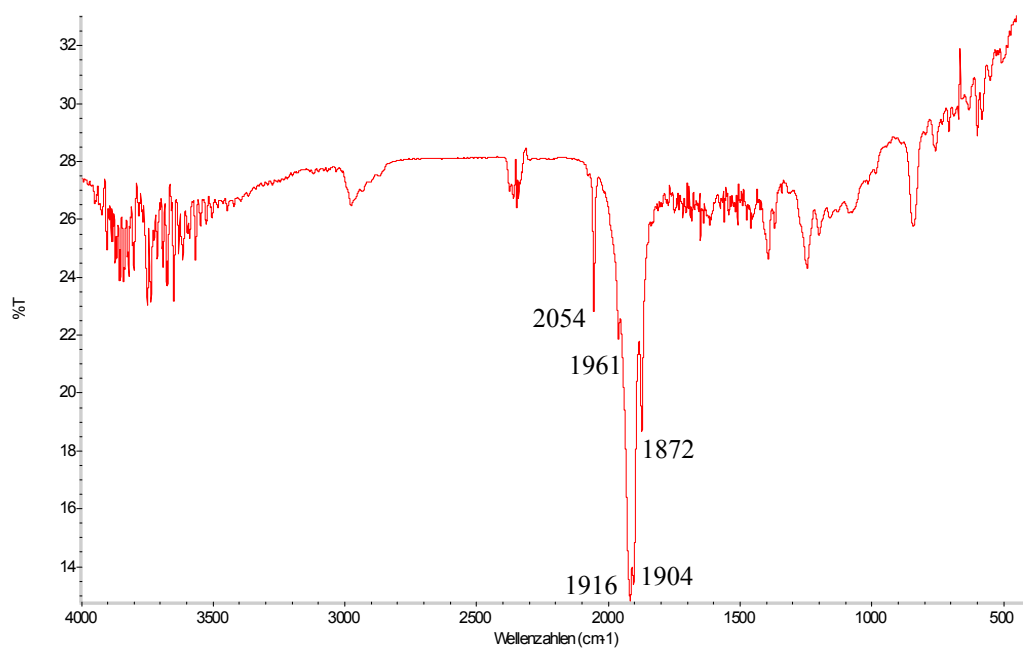**Figure S19.** IR spectrum (KBr) of compound **2**.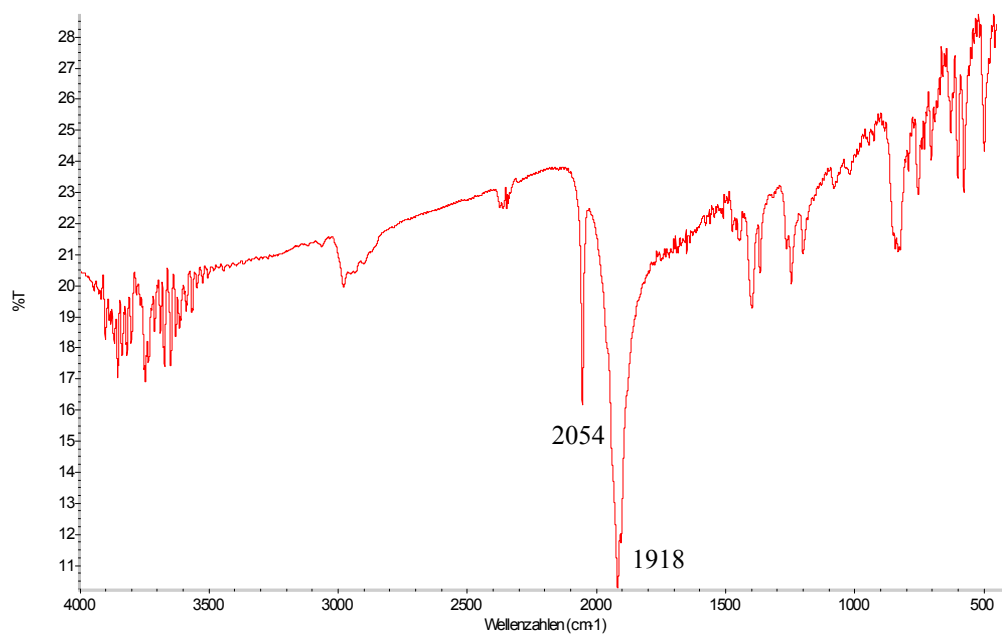**Figure S20.** IR spectrum (KBr) of compound **3**.

2.7 UV/Vis Spectrum of **2**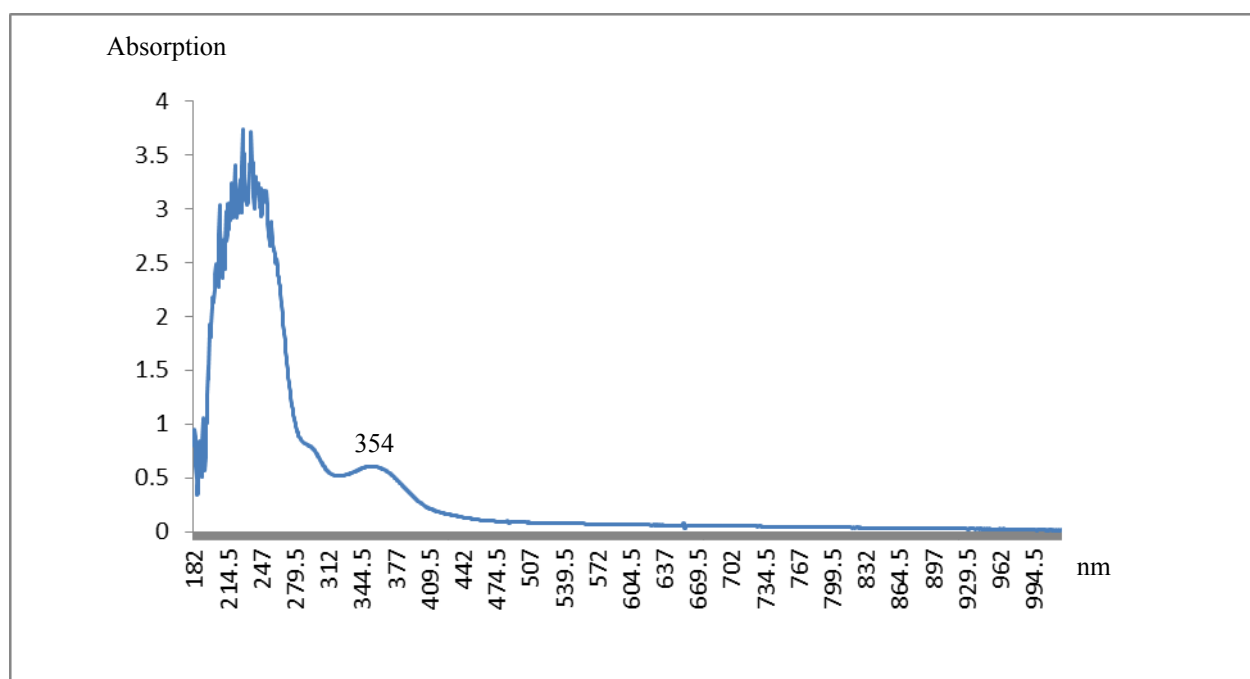

**Figure S21.** UV/Vis spectrum of compound **2** in hexane.



### 3. Single-Crystal X-ray Structure Determinations of **2** and **3**

**Table S1.** Crystallographic data and structure refinement for compounds **2** and **3**.

|                                   |                                                                                            |                                                                                                                         |
|-----------------------------------|--------------------------------------------------------------------------------------------|-------------------------------------------------------------------------------------------------------------------------|
| Empirical formula                 | C <sub>26</sub> H <sub>41</sub> N <sub>2</sub> O <sub>5</sub> PSi <sub>3</sub> W, <b>2</b> | C <sub>52</sub> H <sub>82</sub> N <sub>4</sub> O <sub>10</sub> P <sub>2</sub> Si <sub>6</sub> W <sub>2</sub> , <b>3</b> |
| Formula weight                    | 760.70                                                                                     | 1521.40                                                                                                                 |
| Temperature                       | 150(2) K                                                                                   | 150(2) K                                                                                                                |
| Wavelength                        | 1.541840 Å                                                                                 | 1.541840 Å                                                                                                              |
| Crystal system                    | Orthorhombic                                                                               | Monoclinic                                                                                                              |
| Space group                       | Pna21                                                                                      | I2/a                                                                                                                    |
| <i>a</i> /Å                       | 20.7398(2)                                                                                 | 18.8405(3)                                                                                                              |
| <i>b</i> /Å                       | 9.20180(10)                                                                                | 10.1491(2)                                                                                                              |
| <i>c</i> /Å                       | 17.6394(2)                                                                                 | 34.9207(5)                                                                                                              |
| $\alpha$ /°                       | 90.00                                                                                      | 90.00                                                                                                                   |
| $\beta$ /°                        | 90.00                                                                                      | 92.3180(10)                                                                                                             |
| $\gamma$ /°                       | 90.00                                                                                      | 90.00                                                                                                                   |
| Volume                            | 3366.37(6) Å <sup>3</sup>                                                                  | 6671.87(19) Å <sup>3</sup>                                                                                              |
| <i>Z</i>                          | 4                                                                                          | 4                                                                                                                       |
| Density (calculated)              | 1.501 Mg/m <sup>3</sup>                                                                    | 1.515 Mg/m <sup>3</sup>                                                                                                 |
| Absorption coefficient            | 8.118 mm <sup>-1</sup>                                                                     | 8.192 mm <sup>-1</sup>                                                                                                  |
| F(000)                            | 1528                                                                                       | 3056                                                                                                                    |
| Crystal size [mm <sup>3</sup> ]   | 0.21 x 0.15 x 0.03                                                                         | 0.27 x 0.23 x 0.09                                                                                                      |
| Theta range for data collection   | 4.25 to 73.07°                                                                             | 2.61 to 73.52°                                                                                                          |
| Index range                       | -24 ≤ <i>h</i> ≤ 18, -11 ≤ <i>k</i> ≤ 10, -21 ≤ <i>l</i> ≤ 19                              | -22 ≤ <i>h</i> ≤ 21, -12 ≤ <i>k</i> ≤ 8, -41 ≤ <i>l</i> ≤ 38                                                            |
| Reflections collected             | 5353                                                                                       | 5992                                                                                                                    |
| Independent reflections           | 5172                                                                                       | 5488                                                                                                                    |
| Absorption correction             | Semi-empirical from equivalents                                                            | Semi-empirical from equivalents                                                                                         |
| Refinement method                 | Full-matrix least-squares on F <sup>2</sup>                                                | Full-matrix least-squares on F <sup>2</sup>                                                                             |
| Data / restraints / parameters    | 5353/ 20/ 355                                                                              | 5992 / 118 / 542                                                                                                        |
| Goodness-of-fit on F <sup>2</sup> | 1.067                                                                                      | 1.065                                                                                                                   |
| Final R indices [I > 2σ(I)]       | R1 = 0.0468<br>wR2 = 0.1188                                                                | R1 = 0.0361,<br>wR2 = 0.0854                                                                                            |
| R indices (all data)              | R1 = 0.0485<br>wR2 = 0.1210                                                                | R1 = 0.0397,<br>wR2 = 0.0881                                                                                            |

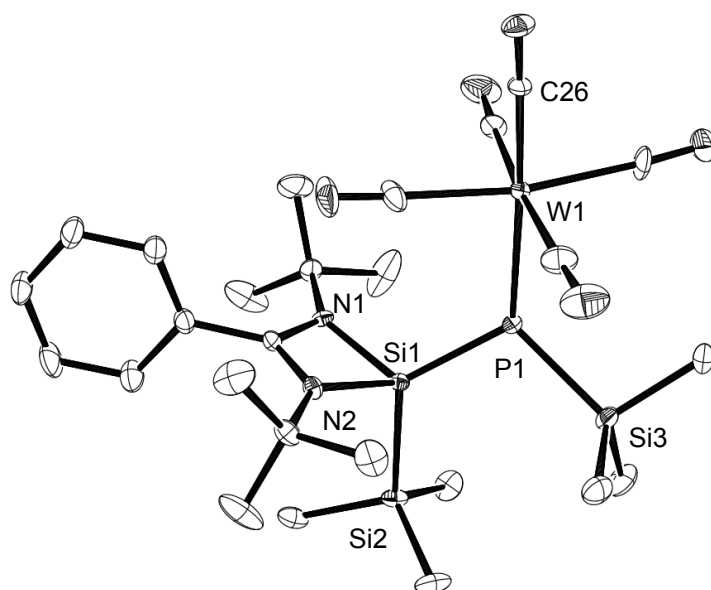

**Figure S22.** Molecular structure of of compound **2**. Thermal ellipsoids are drawn at 30% probability level. Hydrogen atoms are omitted for clarity. Selected bond length (Å) and angles (°) in **2**: Si1–P1 2.158(2), Si1–Si2 2.369(2), P1–Si3 2.253(2), P1–W1 2.6265(18), W1–C26 2.002(9), N1–Si1 1.826(5), N2–Si1 1.848(5); Si1–P1–W1 118.82(8), Si3–P1–W1 115.55(8), P1–W1–C26 174.6(2).

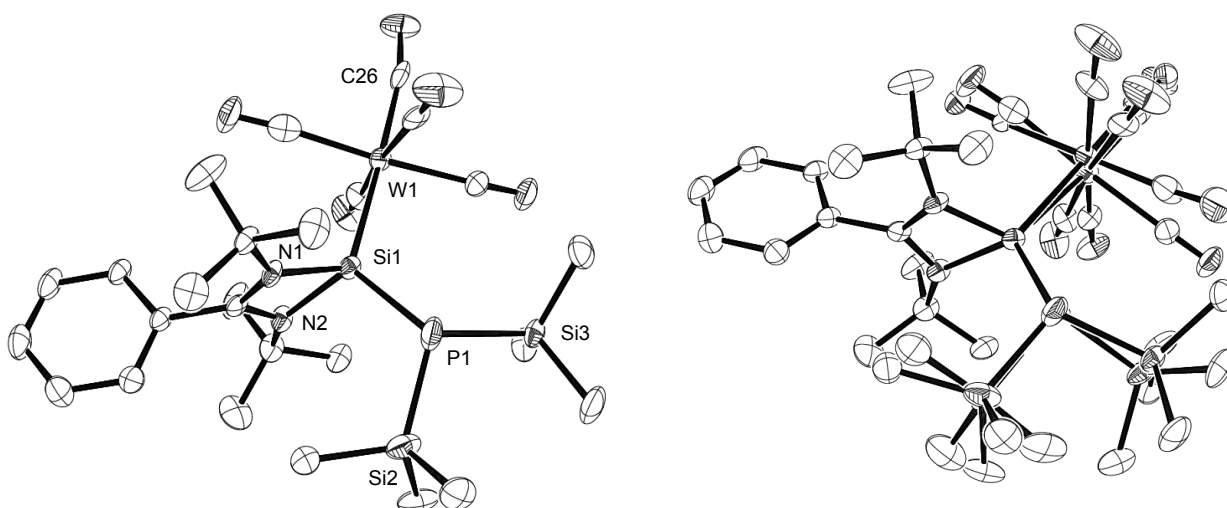

**Figure S23.** Molecular structure of compound **3**. Thermal ellipsoids are drawn at 30% probability level. Hydrogen atoms are omitted for clarity. One of the disordered fractions is depicted on the left and the disorder is shown on the right. Selected bond length (Å) and angles (°) in **3**: Si1–P1 2.249(9), Si1–W1 2.562(3), P1–Si2 2.228(13), P1–Si3 2.177(10), Si1–N7 1.872(3), Si1–N8 1.871(3), W–C26 2.002(9); W1–Si1–P1 122.0(3), Si1–W1–C26 176.1(9).

**Table S2.** Selected interatomic distances and angles for **2**.

| Interatomic distances (Å) |            | Angles (°) |            |
|---------------------------|------------|------------|------------|
| P1-Si1                    | 2.158(2)   | W1-P1-Si1  | 118.82(8)  |
| P1-W1                     | 2.6265(18) | W1-P1-Si3  | 115.55(8)  |
| P1-Si3                    | 2.253(2)   | Si1-P1-Si3 | 108.85(10) |
| Si1-N1                    | 1.826(5)   | P1-Si1-Si2 | 120.28(9)  |
| Si1-N2                    | 1.848(5)   | P1-Si1-N1  | 115.10(18) |
| Si1-Si2                   | 2.369(2)   | P1-Si1-N2  | 126.54(16) |
| N1-C1                     | 1.326(8)   | N1-Si1-Si2 | 107.85(17) |
| N2-C1                     | 1.340(8)   | N2-Si1-Si2 | 104.97(18) |
| W1-C26                    | 2.002(9)   | N1-Si1-N2  | 71.3(2)    |
| C26-O5                    | 1.128(12)  | N1-C1-N2   | 106.9(5)   |
| W1-C25                    | 2.065(9)   | P1-W1-C26  | 174.6(2)   |
| C25-O4                    | 1.079(12)  | P1-W1-C25  | 90.6(2)    |
| W1-C24                    | 2.045(8)   | P1-W1-C24  | 90.6(3)    |
| C24-O3                    | 1.125(13)  | P1-W1-C23  | 96.3(4)    |
| W1-C23                    | 2.093(6)   | P1-W1-C22  | 88.5(3)    |
| C23-O2                    | 1.086(9)   |            |            |
| W1-C22                    | 2.032(10)  |            |            |
| C22-O1                    | 1.152(16)  |            |            |

**Table S3.** Selected interatomic distances and angles for **3**.

| Interatomic distances (Å) |           | Angles (°)    |            |
|---------------------------|-----------|---------------|------------|
| Si1-P1A                   | 2.249(9)  | W1A-Si1-P1A   | 122.0(3)   |
| Si1-P1B                   | 2.237(6)  | W1B-Si1-P1B   | 120.69(19) |
| Si1-W1A                   | 2.562(3)  | Si1-P1A-Si2A  | 117.6(5)   |
| Si1-W1B                   | 2.619(2)  | Si1-P1A-Si3A  | 118.2(5)   |
| P1A-Si2A                  | 2.228(13) | Si2A-P1A-Si3A | 107.8(4)   |
| P1A-Si3A                  | 2.177(10) | Si1-P1B-Si2B  | 116.8(3)   |
| P1B-Si2B                  | 2.260(10) | Si1-P1B-Si3B  | 107.5(3)   |
| P1B-Si3B                  | 2.375(9)  | Si2B-P1B-Si3B | 101.8(3)   |
| Si1-N1                    | 1.872(3)  | P1A-Si1-N1    | 103.0(3)   |
| Si1-N2                    | 1.871(3)  | P1A-Si1-N2    | 112.7(3)   |
| N1-C1                     | 1.338(5)  | P1B-Si1-N1    | 104.3(2)   |
| N2-C1                     | 1.329(5)  | P1B-Si1-N2    | 113.4(2)   |
| W1A-C26A                  | 2.002(9)  | N1-Si1-N2     | 69.69(14)  |
| C26A-O5A                  | 1.151(11) | N1-C1-N2      | 106.6(3)   |
| W1B-C26B                  | 2.006(7)  | N1-Si1-W1A    | 121.93(12) |
| C26B-O5B                  | 1.152(9)  | N2-Si1-W1A    | 116.05(12) |
| W1A-C25A                  | 2.099(13) | N1-Si1-W1B    | 115.62(12) |
| C25A-O4A                  | 1.131(15) | N2-Si2-W1B    | 120.50(12) |
| W1B-C25B                  | 1.969(9)  | Si1-W1A-C26A  | 176.1(9)   |
| C25B-O4B                  | 1.148(12) | Si1-W1A-C25A  | 99.0(3)    |
| W1A-C24A                  | 2.053(14) | Si1-W1A-C24A  | 87.2(4)    |
| C24A-O3A                  | 1.147(17) | Si1-W1A-C23A  | 87.0(7)    |
| W1B-C24B                  | 2.023(9)  | Si1-W1A-C22A  | 96.2(4)    |
| C24B-O3B                  | 1.137(11) | Si1-W1B-C26B  | 172.8(9)   |
| W1A-C23A                  | 2.036(9)  | Si1-W1B-C25B  | 91.6(3)    |
| C23A-O2A                  | 1.130(10) | Si1-W1B-C24B  | 96.2(2)    |
| W1B-C23B                  | 2.057(7)  | Si1-W1B-C23B  | 84.3(4)    |

|          |           |              |         |
|----------|-----------|--------------|---------|
| C23B-O2B | 1.132(8)  | Si1-W1B-C22B | 89.5(3) |
| W1A-C22A | 2.045(17) |              |         |
| C22A-O1A | 1.13(2)   |              |         |
| W1B-C22B | 2.015(10) |              |         |
| C22B-O1B | 1.157(13) |              |         |

## 4. Additional Results of Computational Investigations

### 4.1 The Transition State with a 0° Torsion Angle

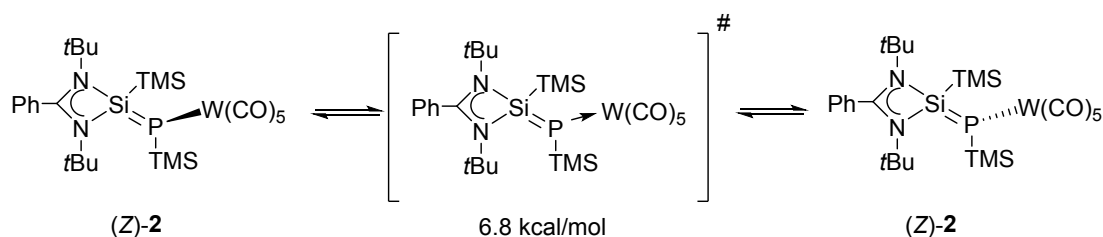

**Figure S24.** Interconversion of the two (*Z*)-**2** orientations through a transition state with a Si2-Si1-P1-W1 torsion angle of 0°.

### 4.2 Description and Depiction of the MOs of (*E*)-**2**

**More detailed description of the molecular orbitals of (*E*)-**2**.** TD-DFT calculation on the B3LYP/cc-pVTZ//B97-D/6-31G(d) level of theory predicted the UV/Vis-transition of (*E*)-**2** to be at 383 nm (3.24 eV, oscillator strength 0.050), which is red shifted from **1** (333 nm). The UV/Vis transition of (*E*)-**2** occurs mainly from the HOMO to the LUMO (weight 0.55, Figure S25). The HOMO of (*E*)-**2** (-4.13 eV) is determined by the antibonding combination of the  $\pi$  orbital of the phosphasilene and a filled d-orbital of tungsten, while the LUMO of (*E*)-**2** (-1.92 eV) is marked by the  $\pi^*$  orbitals of the phenyl ring. The electron transitions to the LUMO+1 (-1.70 eV, weight 0.11), which is best described as the Si-P antibonding orbital and the LUMO+2 (-1.51 eV, weight 0.15) show a significantly lower contribution. In the case of **1**, UV/Vis transitions were calculated to occur from the HOMO (-5.94 eV, determined by the  $\pi$  orbital of the phosphasilene) to the LUMO and LUMO+2 (-0.16 eV and +0.45 eV, marked by the benzene moiety and the N-C-N-Si four membered ring, weight 0.12 and 0.68, respectively) as well as the LUMO+3 (+1.32 eV, the  $\pi^*$  orbital of silicon-phosphorus double bond, weight 0.32).<sup>2</sup> Thus, the influence of the coordination to tungsten is determined by the interaction between the silicon-phosphorus bond and tungsten leading to a higher lying HOMO orbital and lower lying LUMO orbitals of (*E*)-**2**.

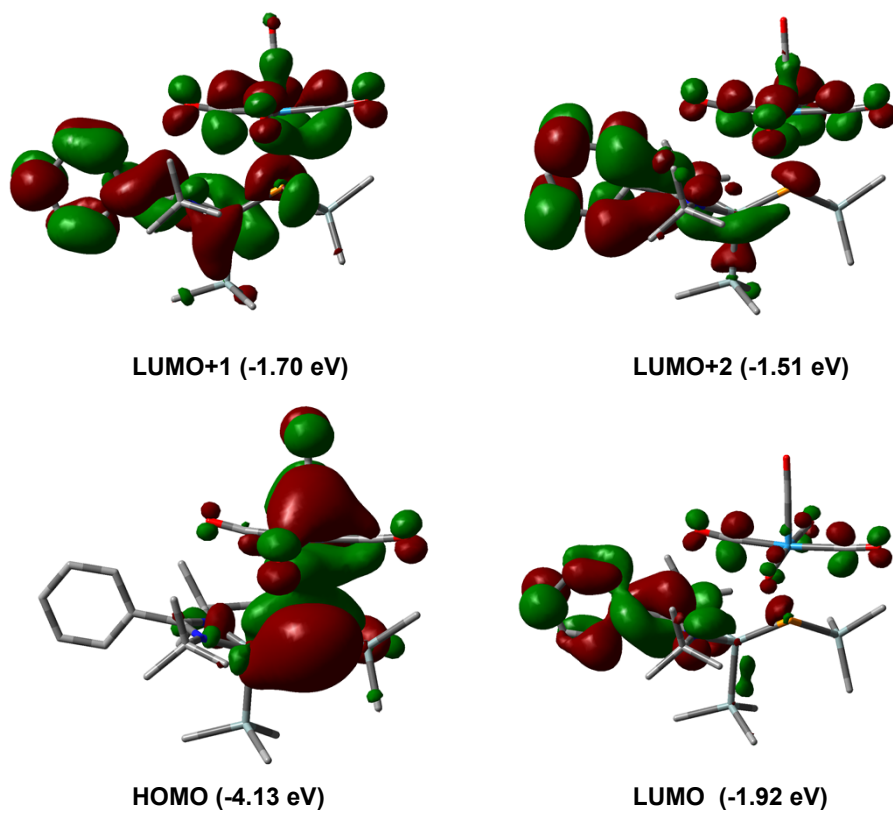

**Figure S25.** Molecular orbitals of (*E*)-**2** that are involved in the UV/Vis transition calculated at the B97-D/6-31G(d) level of theory.

4.3 Mechanism for the Formation of **3** from **2**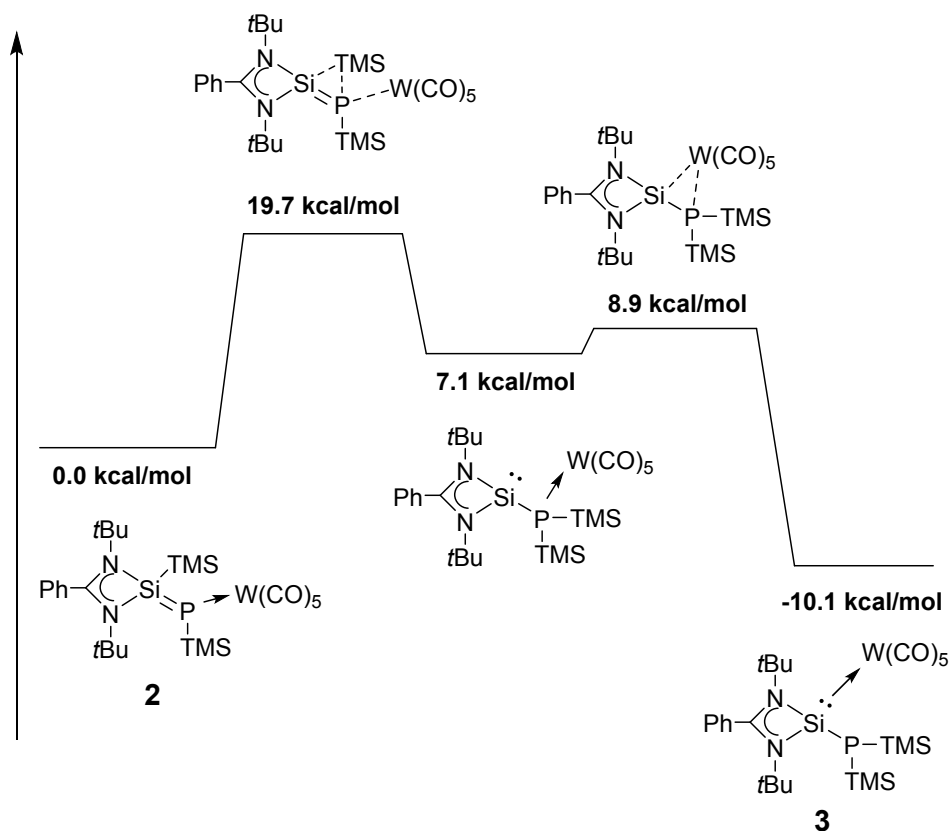

**Figure S26.** Mechanism for the formation of **3** from **2** based on DFT calculations on the B97-D/6-31G(d) level of theory.

## 5. Computational Details

DFT calculations were performed at the RI-B97-D/6-31G\* level of theory.<sup>4-8</sup> TD-DFT calculations were carried out at the CAM-B3LYP/cc-pVTZ//RI-B97-D/6-31G\* level of theory.<sup>9-10</sup> Stationary points on the potential energy surface (PES) were characterized by harmonic vibrational frequency calculations. Transition states, with one imaginary frequency, were confirmed by intrinsic reaction coordinate (IRC) calculations. Calculations were carried out using GAUSSIAN 09 program.<sup>11</sup>

**Table S4.** Cartesian geometry of (*E*)-**2** at B97-D/6-31G\* level in Angstrom [Å].

|    |           |           |           |
|----|-----------|-----------|-----------|
| C  | 4.623714  | -3.586753 | -0.606770 |
| C  | 3.480271  | -2.794501 | -0.423289 |
| C  | 3.613407  | -1.401484 | -0.269504 |
| C  | 4.893960  | -0.811673 | -0.302261 |
| C  | 6.032304  | -1.610318 | -0.481385 |
| C  | 5.899273  | -2.999921 | -0.635439 |
| C  | 2.437357  | -0.507645 | -0.078663 |
| N  | 1.869551  | 0.277176  | -1.011229 |
| C  | 2.123627  | 0.411113  | -2.465900 |
| C  | 0.931332  | 1.210512  | -3.027104 |
| N  | 1.828464  | -0.218463 | 1.094118  |
| Si | 0.872464  | 1.177794  | 0.315088  |
| Si | 2.116231  | 3.143512  | 0.710101  |
| C  | 1.793903  | 4.450455  | -0.650804 |
| C  | 2.018291  | -0.792063 | 2.455801  |
| C  | 1.639645  | -2.290913 | 2.443536  |
| C  | 1.058212  | -0.034441 | 3.393282  |
| C  | 3.465132  | -0.612660 | 2.967789  |
| P  | -1.249880 | 1.099582  | 0.663361  |
| Si | -2.191244 | 2.968006  | -0.208188 |
| C  | -1.797590 | 3.367048  | -2.036077 |
| C  | 3.431447  | 1.200363  | -2.705282 |
| C  | 2.192876  | -0.962019 | -3.167825 |
| W  | -2.422767 | -1.170897 | -0.032079 |
| C  | -3.318754 | -2.886191 | -0.541607 |
| O  | -3.816098 | -3.900884 | -0.862817 |
| C  | -2.677365 | -0.388312 | -1.910928 |
| O  | -2.813937 | 0.065255  | -2.981828 |
| C  | -0.698769 | -2.086730 | -0.587916 |
| O  | 0.209846  | -2.756526 | -0.914964 |
| C  | -2.129583 | -1.815221 | 1.897725  |
| O  | -1.988078 | -2.172560 | 3.003272  |
| C  | -4.270486 | -0.491298 | 0.579031  |



|   |           |           |           |
|---|-----------|-----------|-----------|
| O | -5.337736 | -0.221240 | 0.966932  |
| C | -4.072374 | 2.682876  | -0.101942 |
| C | -1.779156 | 4.500535  | 0.864226  |
| C | 1.682811  | 3.840733  | 2.434912  |
| C | 3.985740  | 2.717682  | 0.671190  |
| H | 4.303031  | 0.635246  | -2.342984 |
| H | 3.558608  | 1.384417  | -3.784279 |
| H | 1.276276  | -1.537944 | -2.981877 |
| H | 2.292464  | -0.792273 | -4.252332 |
| H | 3.058031  | -1.548697 | -2.831359 |
| H | 2.491051  | -3.245462 | -0.418896 |
| H | 0.865227  | 2.195203  | -2.539435 |
| H | 1.069513  | 1.369914  | -4.107384 |
| H | -0.014735 | 0.675356  | -2.862835 |
| H | 4.513556  | -4.665878 | -0.730064 |
| H | -4.595254 | 3.609174  | -0.401370 |
| H | -4.398196 | 1.876693  | -0.777668 |
| H | -2.397777 | 4.240366  | -2.353046 |
| H | -0.739272 | 3.614579  | -2.213205 |
| H | -2.060575 | 2.522247  | -2.692950 |
| H | 4.992609  | 0.265496  | -0.166942 |
| H | 0.016082  | -0.135316 | 3.057914  |
| H | 1.147242  | -0.451756 | 4.408761  |
| H | 1.311278  | 1.038081  | 3.431772  |
| H | 3.722459  | 0.455653  | 3.037778  |
| H | 3.540868  | -1.048662 | 3.977152  |
| H | 4.194206  | -1.117370 | 2.320633  |
| H | 0.594215  | 3.896263  | 2.597856  |
| H | 2.111480  | 3.210906  | 3.234170  |
| H | 2.099638  | 4.857380  | 2.551931  |
| H | 4.583402  | 3.604031  | 0.951838  |
| H | 4.234019  | 1.909413  | 1.378950  |
| H | 4.309387  | 2.402839  | -0.336069 |
| H | 3.393078  | 2.171610  | -2.188652 |
| H | 2.306630  | 4.178723  | -1.592472 |
| H | 0.722460  | 4.572852  | -0.875971 |
| H | 2.183752  | 5.433714  | -0.330286 |
| H | 2.370083  | -2.879411 | 1.872026  |
| H | 1.624213  | -2.667559 | 3.478252  |
| H | 0.642847  | -2.430638 | 2.005757  |
| H | -4.399627 | 2.421420  | 0.917605  |
| H | -1.832082 | 4.256183  | 1.939470  |
| H | -0.779284 | 4.919476  | 0.661754  |
| H | -2.521562 | 5.295614  | 0.664062  |
| H | 6.785346  | -3.621818 | -0.777132 |

|   |          |           |           |
|---|----------|-----------|-----------|
| H | 7.020512 | -1.146172 | -0.498834 |
|---|----------|-----------|-----------|

**Table S5.** Cartesian geometry of transtion state on Scheme 1 at B97-D/6-31G\* level in Angstrom [Å].

|    |           |           |           |
|----|-----------|-----------|-----------|
| C  | 5.718936  | -3.279404 | -1.748733 |
| C  | 4.457713  | -3.177236 | -2.358622 |
| C  | 3.488060  | -2.314078 | -1.828156 |
| C  | 3.782746  | -1.543942 | -0.686830 |
| C  | 5.043616  | -1.654250 | -0.070286 |
| C  | 6.008822  | -2.521818 | -0.601788 |
| C  | 2.761944  | -0.596785 | -0.163446 |
| N  | 1.749051  | -0.879409 | 0.674542  |
| C  | 1.420466  | -2.159618 | 1.366673  |
| C  | 2.625599  | -2.726606 | 2.149631  |
| N  | 2.713882  | 0.730805  | -0.416440 |
| Si | 1.160653  | 0.888989  | 0.657574  |
| P  | -0.841693 | 1.027038  | -0.151186 |
| W  | -2.966466 | -0.662562 | -0.070454 |
| C  | -4.168651 | 0.848081  | -0.777726 |
| O  | -4.965633 | 1.646941  | -1.081233 |
| C  | 3.599460  | 1.581465  | -1.257723 |
| C  | 3.825748  | 1.007730  | -2.672577 |
| C  | 2.987395  | 2.995154  | -1.367900 |
| C  | 4.964242  | 1.741507  | -0.535832 |
| Si | 1.896297  | 1.965284  | 2.621983  |
| C  | 3.541181  | 1.154811  | 3.175970  |
| C  | 2.182589  | 3.829797  | 2.305155  |
| C  | 0.574055  | 1.788820  | 3.986309  |
| C  | 0.941051  | -3.186465 | 0.318914  |
| C  | 0.307974  | -1.813812 | 2.374461  |
| Si | -0.908799 | 2.781249  | -1.548770 |
| C  | -0.208353 | 4.336649  | -0.680400 |
| C  | 0.056323  | 2.150049  | -3.082302 |
| C  | -2.711140 | 3.129424  | -2.026363 |
| C  | -4.682804 | -1.662499 | -0.111369 |
| O  | -5.702396 | -2.246002 | -0.146095 |
| C  | -2.362280 | -1.213993 | -1.954556 |
| O  | -1.958995 | -1.501931 | -3.013227 |
| C  | -2.324009 | -2.440041 | 0.697768  |
| O  | -2.144145 | -3.510269 | 1.142598  |
| C  | -3.202254 | 0.065590  | 1.836230  |
| O  | -3.270098 | 0.499020  | 2.918393  |
| H  | 5.467279  | 0.774004  | -0.417008 |
| H  | 5.620073  | 2.395488  | -1.132303 |
| H  | 2.863614  | 0.837227  | -3.179196 |

|   |           |           |           |
|---|-----------|-----------|-----------|
| H | 4.402717  | 1.740146  | -3.258835 |
| H | 4.388938  | 0.066892  | -2.647976 |
| H | 2.508206  | -2.222991 | -2.298895 |
| H | 2.728111  | 3.385241  | -0.373183 |
| H | 3.767209  | 3.654088  | -1.782911 |
| H | 2.136469  | 3.062106  | -2.050329 |
| H | 4.227434  | -3.768470 | -3.246681 |
| H | -2.812164 | 4.107626  | -2.526996 |
| H | -3.041287 | 2.359432  | -2.741081 |
| H | 0.400174  | 2.896450  | -3.820836 |
| H | 0.892042  | 1.515531  | -2.747325 |
| H | -0.639711 | 1.473168  | -3.610216 |
| H | 5.251941  | -1.077952 | 0.832474  |
| H | -0.569642 | -1.400556 | 1.864485  |
| H | 0.001200  | -2.712784 | 2.929029  |
| H | 0.680529  | -1.068031 | 3.092920  |
| H | 2.926915  | -2.041834 | 2.957918  |
| H | 2.321143  | -3.682800 | 2.603169  |
| H | 3.488572  | -2.918825 | 1.500815  |
| H | -0.432567 | 2.009920  | 3.593927  |
| H | 0.545890  | 0.778967  | 4.425559  |
| H | 0.786139  | 2.501749  | 4.802862  |
| H | 3.891126  | 1.593734  | 4.126857  |
| H | 3.417752  | 0.070712  | 3.334425  |
| H | 4.336853  | 1.293970  | 2.426104  |
| H | 4.823915  | 2.199515  | 0.454604  |
| H | 3.094272  | 4.014676  | 1.712846  |
| H | 1.334443  | 4.296621  | 1.780238  |
| H | 2.303647  | 4.348710  | 3.272332  |
| H | 1.782042  | -3.509967 | -0.310327 |
| H | 0.520236  | -4.066858 | 0.824737  |
| H | 0.164619  | -2.740513 | -0.316827 |
| H | -3.399763 | 3.054962  | -1.179217 |
| H | -0.701432 | 4.424758  | 0.302069  |
| H | 0.874312  | 4.290614  | -0.504705 |
| H | -0.418520 | 5.259440  | -1.250304 |
| H | 6.472604  | -3.951731 | -2.162894 |
| H | 6.983539  | -2.608744 | -0.118228 |

**Table S6.** Cartesian geometry of (Z)-**2** at B97-D/6-31G\* level in Angstrom [ $\text{\AA}$ ].

|   |          |           |           |
|---|----------|-----------|-----------|
| C | 7.353885 | -0.839065 | -0.291528 |
| C | 6.460729 | -1.888302 | -0.019534 |
| C | 5.084230 | -1.635918 | 0.073500  |
| C | 4.596105 | -0.327692 | -0.107501 |
| C | 5.491818 | 0.723594  | -0.382946 |

|    |           |           |           |
|----|-----------|-----------|-----------|
| C  | 6.867271  | 0.466029  | -0.473539 |
| C  | 3.136745  | -0.053756 | -0.004914 |
| Si | 0.871077  | 0.542734  | 0.110860  |
| P  | -0.810996 | -0.569143 | 0.881439  |
| W  | -3.228730 | 0.068881  | -0.035877 |
| C  | -3.714096 | -1.863762 | -0.525186 |
| O  | -4.091345 | -2.936928 | -0.800588 |
| N  | 2.238289  | -0.123439 | -1.007077 |
| C  | 2.394838  | -0.550047 | -2.420389 |
| C  | 2.711107  | -2.061525 | -2.479524 |
| N  | 2.465219  | 0.332692  | 1.094451  |
| C  | 2.949774  | 0.635622  | 2.465850  |
| C  | 3.785282  | 1.935388  | 2.467977  |
| C  | 1.043232  | -0.264187 | -3.100295 |
| C  | 3.504540  | 0.242660  | -3.145579 |
| Si | 0.785447  | 2.864758  | -0.317987 |
| C  | 2.547624  | 3.393115  | -0.854131 |
| C  | -0.431576 | 3.300688  | -1.714874 |
| C  | 0.348359  | 3.812947  | 1.279345  |
| C  | 3.789401  | -0.531066 | 3.031575  |
| C  | 1.700086  | 0.827012  | 3.349016  |
| Si | -0.323470 | -2.750642 | 0.574330  |
| C  | -0.626055 | -3.411405 | -1.194022 |
| C  | 1.499008  | -3.108495 | 1.043536  |
| C  | -1.469713 | -3.704433 | 1.763083  |
| C  | -5.075336 | 0.563157  | -0.620247 |
| O  | -6.155962 | 0.860636  | -0.971162 |
| C  | -3.872017 | -0.323032 | 1.883025  |
| O  | -4.234701 | -0.553847 | 2.967992  |
| C  | -2.980164 | 2.026625  | 0.509099  |
| O  | -2.939858 | 3.150135  | 0.838992  |
| C  | -2.499211 | 0.377185  | -1.922754 |
| O  | -2.103223 | 0.534828  | -3.013593 |
| H  | 4.497369  | 0.028336  | -2.729122 |
| H  | 3.505964  | -0.045517 | -4.208660 |
| H  | 1.961543  | -2.637363 | -1.920797 |
| H  | 2.703526  | -2.395446 | -3.529141 |
| H  | 3.706567  | -2.265551 | -2.059741 |
| H  | 4.387790  | -2.443006 | 0.302384  |
| H  | 0.826816  | 0.814484  | -3.098191 |
| H  | 1.070880  | -0.610195 | -4.143923 |
| H  | 0.222783  | -0.777978 | -2.582303 |
| H  | 6.834017  | -2.903872 | 0.124509  |
| H  | -1.320109 | -4.793612 | 1.655661  |
| H  | -1.275202 | -3.431530 | 2.813632  |

|   |           |           |           |
|---|-----------|-----------|-----------|
| H | 1.720435  | -4.184762 | 0.929283  |
| H | 2.191479  | -2.548695 | 0.397267  |
| H | 1.703375  | -2.826573 | 2.088775  |
| H | 5.105633  | 1.731046  | -0.540863 |
| H | 1.087225  | -0.084898 | 3.368341  |
| H | 2.021041  | 1.072320  | 4.373149  |
| H | 1.072477  | 1.649072  | 2.974265  |
| H | 3.194201  | 2.774691  | 2.073501  |
| H | 4.085292  | 2.174956  | 3.500537  |
| H | 4.694782  | 1.818822  | 1.861324  |
| H | -0.588112 | 3.457128  | 1.732906  |
| H | 1.150590  | 3.733728  | 2.031492  |
| H | 0.215655  | 4.883892  | 1.043751  |
| H | 2.608252  | 4.495094  | -0.890989 |
| H | 3.314888  | 3.041849  | -0.146489 |
| H | 2.802505  | 3.010613  | -1.854694 |
| H | 3.314663  | 1.324257  | -3.080772 |
| H | -0.189964 | 2.778484  | -2.654250 |
| H | -1.466611 | 3.045462  | -1.448705 |
| H | -0.389938 | 4.387138  | -1.910270 |
| H | 4.745332  | -0.640231 | 2.503287  |
| H | 4.003131  | -0.328459 | 4.092746  |
| H | 3.230162  | -1.475309 | 2.960422  |
| H | -2.528485 | -3.489370 | 1.547798  |
| H | -1.702409 | -3.506826 | -1.397380 |
| H | -0.195429 | -2.770613 | -1.977606 |
| H | -0.174896 | -4.415597 | -1.296537 |
| H | 8.425000  | -1.037473 | -0.361986 |
| H | 7.556965  | 1.284208  | -0.689176 |

**Table S7.** Cartesian geometry of transtion state on Figure S24 at B97-D/6-31G\* level in Angstrom [ $\text{\AA}$ ].

|   |          |           |           |
|---|----------|-----------|-----------|
| C | 6.949431 | -0.718252 | 0.056092  |
| C | 7.500620 | 0.557809  | -0.147830 |
| C | 6.655197 | 1.667532  | -0.320523 |
| C | 5.262755 | 1.504163  | -0.290408 |
| C | 4.709169 | 0.224808  | -0.083364 |
| C | 5.556898 | -0.886663 | 0.091957  |
| C | 3.234228 | 0.047766  | -0.038692 |
| N | 2.427488 | -0.116362 | -1.106662 |
| C | 2.723007 | -0.206064 | -2.564732 |
| C | 1.361881 | -0.396221 | -3.268550 |
| N | 2.452908 | -0.012564 | 1.058956  |
| C | 2.782338 | 0.093081  | 2.503946  |
| C | 3.560073 | -1.160447 | 2.971029  |

|    |           |           |           |
|----|-----------|-----------|-----------|
| Si | 0.942545  | -0.450500 | 0.016055  |
| Si | 0.787327  | -2.783620 | 0.220445  |
| C  | -0.295136 | -3.498502 | -1.179159 |
| P  | -0.788421 | 0.768466  | -0.196153 |
| Si | -0.231619 | 2.937571  | 0.039434  |
| C  | -1.615123 | 3.983145  | -0.741391 |
| W  | -3.315603 | -0.095088 | -0.192316 |
| C  | -3.249770 | 0.196882  | 1.841200  |
| O  | -3.165054 | 0.378400  | 2.992712  |
| C  | -4.239785 | 1.717073  | -0.456696 |
| O  | -4.942390 | 2.641622  | -0.605785 |
| C  | -5.196555 | -0.749784 | -0.199898 |
| O  | -6.296129 | -1.164782 | -0.193772 |
| C  | -3.075605 | -0.268979 | -2.227830 |
| O  | -2.903691 | -0.348743 | -3.380412 |
| C  | -2.989593 | -2.094468 | 0.074804  |
| O  | -3.064681 | -3.254150 | 0.234716  |
| C  | 3.608362  | 1.361717  | 2.810086  |
| C  | 1.443932  | 0.158057  | 3.269062  |
| C  | 3.631621  | -1.416261 | -2.880243 |
| C  | 3.393413  | 1.083770  | -3.093072 |
| C  | 2.526769  | -3.573004 | 0.052065  |
| C  | 0.154106  | -3.178795 | 1.980090  |
| C  | -0.064327 | 3.521617  | 1.856854  |
| C  | 1.417128  | 3.365448  | -0.824348 |
| H  | 4.555426  | -1.206692 | 2.500796  |
| H  | 3.695112  | -1.126333 | 4.065681  |
| H  | 3.067771  | 2.265813  | 2.484751  |
| H  | 3.766447  | 1.426052  | 3.900372  |
| H  | 4.593964  | 1.337380  | 2.324135  |
| H  | 4.599625  | 2.363226  | -0.416887 |
| H  | 0.817050  | -0.720828 | 3.043939  |
| H  | 1.646956  | 0.166669  | 4.352811  |
| H  | 0.879704  | 1.062190  | 3.003460  |
| H  | 7.079710  | 2.662859  | -0.477790 |
| H  | -1.364639 | 5.055536  | -0.628734 |
| H  | -1.750741 | 3.772165  | -1.816378 |
| H  | 1.602628  | 4.453083  | -0.735013 |
| H  | 2.269032  | 2.842581  | -0.354406 |
| H  | 1.403479  | 3.108942  | -1.897859 |
| H  | 5.119980  | -1.877588 | 0.239202  |
| H  | 0.651334  | 0.394800  | -2.979648 |
| H  | 1.509890  | -0.363402 | -4.360491 |
| H  | 0.916476  | -1.370361 | -3.008171 |
| H  | 3.119610  | -2.362306 | -2.644583 |

|   |           |           |           |
|---|-----------|-----------|-----------|
| H | 3.862020  | -1.416149 | -3.959886 |
| H | 4.581764  | -1.367703 | -2.327927 |
| H | -1.208062 | -2.910698 | -1.357065 |
| H | 0.278664  | -3.527974 | -2.123474 |
| H | -0.600027 | -4.533533 | -0.938860 |
| H | 2.421022  | -4.672680 | 0.114676  |
| H | 3.002020  | -3.342131 | -0.914875 |
| H | 3.220505  | -3.263021 | 0.853566  |
| H | 2.996546  | -2.074040 | 2.720999  |
| H | 0.971950  | -3.063544 | 2.715813  |
| H | -0.672202 | -2.518613 | 2.286619  |
| H | -0.213797 | -4.218849 | 2.041905  |
| H | 4.416130  | 1.194952  | -2.703706 |
| H | 3.453591  | 1.024185  | -4.193079 |
| H | 2.802594  | 1.971114  | -2.826091 |
| H | -2.580321 | 3.813657  | -0.239965 |
| H | -0.868461 | 3.109150  | 2.491405  |
| H | 0.905006  | 3.235537  | 2.302993  |
| H | -0.138599 | 4.625153  | 1.900833  |
| H | 8.586055  | 0.687469  | -0.173539 |
| H | 7.602991  | -1.585130 | 0.187159  |

**Table S8.** Cartesian geometry of transtion state (19.7 kcal/mol) on Figure S26 at B97-D/6-31G\* level in Angstrom [ $\text{\AA}$ ].

|    |           |           |           |
|----|-----------|-----------|-----------|
| C  | 6.867271  | 0.466029  | -0.473539 |
| C  | 7.353885  | -0.839065 | -0.291528 |
| C  | 6.460729  | -1.888302 | -0.019534 |
| C  | 5.084230  | -1.635918 | 0.073500  |
| C  | 4.596105  | -0.327692 | -0.107501 |
| C  | 5.491818  | 0.723594  | -0.382946 |
| C  | 3.136745  | -0.053756 | -0.004914 |
| N  | 2.465219  | 0.332692  | 1.094451  |
| C  | 2.949774  | 0.635622  | 2.465850  |
| C  | 1.700086  | 0.827012  | 3.349016  |
| N  | 2.238289  | -0.123439 | -1.007077 |
| C  | 2.394838  | -0.550047 | -2.420389 |
| C  | 3.504540  | 0.242660  | -3.145579 |
| Si | 0.871077  | 0.542734  | 0.110860  |
| Si | -0.720494 | 1.934153  | 1.277502  |
| C  | -1.765224 | 0.877000  | 2.474392  |
| P  | -0.810996 | -0.569143 | 0.881439  |
| Si | -0.323470 | -2.750642 | 0.574330  |
| C  | -1.469713 | -3.704433 | 1.763083  |
| W  | -3.515329 | -0.829556 | -1.074343 |
| C  | -2.359589 | -1.021169 | -2.752170 |

|   |           |           |           |
|---|-----------|-----------|-----------|
| O | -1.713691 | -1.156161 | -3.719734 |
| C | -3.625083 | -2.871121 | -0.900903 |
| O | -3.788275 | -4.027904 | -0.829699 |
| C | -5.189916 | -0.942932 | -2.160004 |
| O | -6.168507 | -1.004652 | -2.806484 |
| C | -4.586987 | -0.686861 | 0.680873  |
| O | -5.190835 | -0.614468 | 1.676913  |
| C | -3.649944 | 1.205389  | -1.254405 |
| O | -3.829724 | 2.358058  | -1.362857 |
| C | 2.711107  | -2.061525 | -2.479524 |
| C | 1.043232  | -0.264187 | -3.100295 |
| C | 3.785282  | 1.935388  | 2.467977  |
| C | 3.789401  | -0.531066 | 3.031575  |
| C | 0.294771  | 3.200148  | 2.296508  |
| C | -1.880810 | 2.863389  | 0.088949  |
| C | -0.626055 | -3.411405 | -1.194022 |
| C | 1.499008  | -3.108495 | 1.043536  |
| H | 4.497369  | 0.028336  | -2.729122 |
| H | 3.505964  | -0.045517 | -4.208660 |
| H | 1.961543  | -2.637363 | -1.920797 |
| H | 2.703526  | -2.395446 | -3.529141 |
| H | 3.706567  | -2.265551 | -2.059741 |
| H | 4.387790  | -2.443006 | 0.302384  |
| H | 0.826816  | 0.814484  | -3.098191 |
| H | 1.070880  | -0.610195 | -4.143923 |
| H | 0.222783  | -0.777978 | -2.582303 |
| H | 6.834017  | -2.903872 | 0.124509  |
| H | -1.320109 | -4.793612 | 1.655661  |
| H | -1.275202 | -3.431530 | 2.813632  |
| H | 1.720435  | -4.184762 | 0.929283  |
| H | 2.191479  | -2.548695 | 0.397267  |
| H | 1.703375  | -2.826573 | 2.088775  |
| H | 5.105633  | 1.731046  | -0.540863 |
| H | 1.087225  | -0.084898 | 3.368341  |
| H | 2.021041  | 1.072320  | 4.373149  |
| H | 1.072477  | 1.649072  | 2.974265  |
| H | 3.194201  | 2.774691  | 2.073501  |
| H | 4.085292  | 2.174956  | 3.500537  |
| H | 4.694782  | 1.818822  | 1.861324  |
| H | -2.265846 | 0.041109  | 1.964524  |
| H | -1.153106 | 0.466997  | 3.294627  |
| H | -2.551600 | 1.506997  | 2.926891  |
| H | -0.375379 | 3.741331  | 2.987458  |
| H | 1.071947  | 2.709949  | 2.903584  |
| H | 0.783220  | 3.946730  | 1.651192  |



|   |           |           |           |
|---|-----------|-----------|-----------|
| H | 3.314663  | 1.324257  | -3.080772 |
| H | -1.326278 | 3.489166  | -0.628266 |
| H | -2.510886 | 2.173214  | -0.488931 |
| H | -2.547616 | 3.524261  | 0.671105  |
| H | 4.745332  | -0.640231 | 2.503287  |
| H | 4.003130  | -0.328459 | 4.092746  |
| H | 3.230162  | -1.475309 | 2.960422  |
| H | -2.528485 | -3.489370 | 1.547797  |
| H | -1.702409 | -3.506826 | -1.397380 |
| H | -0.195429 | -2.770613 | -1.977606 |
| H | -0.174896 | -4.415597 | -1.296537 |
| H | 8.425000  | -1.037473 | -0.361986 |
| H | 7.556965  | 1.284208  | -0.689176 |

**Table S9.** Cartesian geometry of intermediate (7.1 kcal/mol) on Figure S26 at B97-D/6-31G\* level in Angstrom [ $\text{\AA}$ ].

|    |           |           |           |
|----|-----------|-----------|-----------|
| C  | 6.867271  | 0.466029  | -0.473539 |
| C  | 7.353885  | -0.839065 | -0.291528 |
| C  | 6.460729  | -1.888302 | -0.019534 |
| C  | 5.084230  | -1.635918 | 0.073500  |
| C  | 4.596105  | -0.327692 | -0.107501 |
| C  | 5.491818  | 0.723594  | -0.382946 |
| C  | 3.136745  | -0.053756 | -0.004914 |
| N  | 2.465219  | 0.332692  | 1.094451  |
| C  | 2.949774  | 0.635622  | 2.465850  |
| C  | 1.700086  | 0.827012  | 3.349016  |
| N  | 2.238289  | -0.123439 | -1.007077 |
| C  | 2.394838  | -0.550047 | -2.420389 |
| C  | 3.504540  | 0.242660  | -3.145579 |
| Si | 0.871077  | 0.542734  | 0.110860  |
| Si | -1.239472 | 1.701860  | 1.807999  |
| C  | -2.467865 | 1.010882  | 3.094535  |
| P  | -0.810996 | -0.569143 | 0.881439  |
| Si | -0.323470 | -2.750642 | 0.574330  |
| C  | -1.469713 | -3.704433 | 1.763083  |
| W  | -3.515329 | -0.829556 | -1.074343 |
| C  | -2.359589 | -1.021169 | -2.752170 |
| O  | -1.713691 | -1.156161 | -3.719734 |
| C  | -3.625083 | -2.871121 | -0.900903 |
| O  | -3.788275 | -4.027904 | -0.829699 |
| C  | -5.189916 | -0.942932 | -2.160004 |
| O  | -6.168507 | -1.004652 | -2.806484 |
| C  | -4.586987 | -0.686861 | 0.680873  |
| O  | -5.190835 | -0.614468 | 1.676913  |
| C  | -3.649944 | 1.205389  | -1.254405 |

|   |           |           |           |
|---|-----------|-----------|-----------|
| O | -3.829724 | 2.358058  | -1.362857 |
| C | 2.711107  | -2.061525 | -2.479524 |
| C | 1.043232  | -0.264187 | -3.100295 |
| C | 3.785282  | 1.935388  | 2.467977  |
| C | 3.789401  | -0.531066 | 3.031575  |
| C | -0.371927 | 2.893866  | 3.032077  |
| C | -2.303069 | 2.552162  | 0.478254  |
| C | -0.626055 | -3.411405 | -1.194022 |
| C | 1.499008  | -3.108495 | 1.043536  |
| H | 4.497369  | 0.028336  | -2.729122 |
| H | 3.505964  | -0.045517 | -4.208660 |
| H | 1.961543  | -2.637363 | -1.920797 |
| H | 2.703526  | -2.395446 | -3.529141 |
| H | 3.706567  | -2.265551 | -2.059741 |
| H | 4.387790  | -2.443006 | 0.302384  |
| H | 0.826816  | 0.814484  | -3.098191 |
| H | 1.070880  | -0.610195 | -4.143923 |
| H | 0.222783  | -0.777978 | -2.582303 |
| H | 6.834017  | -2.903872 | 0.124509  |
| H | -1.320109 | -4.793612 | 1.655661  |
| H | -1.275202 | -3.431530 | 2.813632  |
| H | 1.720435  | -4.184762 | 0.929283  |
| H | 2.191479  | -2.548695 | 0.397267  |
| H | 1.703375  | -2.826573 | 2.088775  |
| H | 5.105633  | 1.731046  | -0.540863 |
| H | 1.087225  | -0.084898 | 3.368341  |
| H | 2.021041  | 1.072320  | 4.373149  |
| H | 1.072477  | 1.649072  | 2.974265  |
| H | 3.194201  | 2.774691  | 2.073501  |
| H | 4.085292  | 2.174956  | 3.500537  |
| H | 4.694782  | 1.818822  | 1.861324  |
| H | -3.084671 | 0.196615  | 2.687321  |
| H | -1.948669 | 0.637501  | 3.992642  |
| H | -3.152761 | 1.816061  | 3.414914  |
| H | -1.090096 | 3.215769  | 3.806676  |
| H | 0.475103  | 2.411420  | 3.544548  |
| H | 0.002241  | 3.797766  | 2.526744  |
| H | 3.314663  | 1.324257  | -3.080772 |
| H | -1.724322 | 3.277645  | -0.115233 |
| H | -2.741672 | 1.825558  | -0.219570 |
| H | -3.131484 | 3.096612  | 0.965685  |
| H | 4.745332  | -0.640231 | 2.503287  |
| H | 4.003130  | -0.328459 | 4.092746  |
| H | 3.230162  | -1.475309 | 2.960422  |
| H | -2.528485 | -3.489370 | 1.547797  |

|   |           |           |           |
|---|-----------|-----------|-----------|
| H | -1.702409 | -3.506826 | -1.397380 |
| H | -0.195429 | -2.770613 | -1.977606 |
| H | -0.174896 | -4.415597 | -1.296537 |
| H | 8.425000  | -1.037473 | -0.361986 |
| H | 7.556965  | 1.284208  | -0.689176 |

**Table S10.** Cartesian geometry of transtion state (8.9 kcal/mol) on Figure S26 at B97-D/6-31G\* level in Angstrom [ $\text{\AA}$ ].

|    |           |           |           |
|----|-----------|-----------|-----------|
| C  | 3.588250  | -0.904198 | 0.200294  |
| C  | 4.745750  | -0.141251 | -0.037847 |
| C  | 6.012612  | -0.731039 | 0.093721  |
| C  | 6.127348  | -2.082179 | 0.456489  |
| C  | 4.971175  | -2.844676 | 0.695567  |
| C  | 3.704660  | -2.259093 | 0.570691  |
| C  | 2.225168  | -0.328451 | 0.036673  |
| N  | 1.517230  | -0.253867 | -1.103887 |
| C  | 1.895979  | -0.595192 | -2.500483 |
| C  | 0.607406  | -0.545912 | -3.348299 |
| N  | 1.418686  | 0.105292  | 1.026649  |
| Si | -0.049748 | 0.196304  | -0.153762 |
| W  | -2.253394 | 0.481887  | -1.954314 |
| C  | -1.179004 | -1.276139 | -1.911395 |
| O  | -0.636611 | -2.307739 | -1.853819 |
| C  | 1.696530  | 0.339913  | 2.466469  |
| C  | 0.367000  | 0.822580  | 3.077848  |
| C  | 2.170422  | -0.933374 | 3.201237  |
| C  | 2.772256  | 1.438211  | 2.626633  |
| P  | -0.530344 | 2.277483  | -0.897234 |
| Si | -1.032444 | 3.674325  | 0.836000  |
| C  | -1.217078 | 5.404020  | 0.040049  |
| Si | 1.305108  | 3.586456  | -1.208439 |
| C  | 1.886663  | 4.495256  | 0.370572  |
| C  | 0.831694  | 4.912492  | -2.498055 |
| C  | 2.769519  | 2.596689  | -1.926841 |
| C  | 2.538756  | -1.995813 | -2.608876 |
| C  | 2.875848  | 0.470269  | -3.041579 |
| C  | -1.027786 | 1.322855  | -3.368321 |
| O  | -0.417887 | 1.881822  | -4.195504 |
| C  | -3.427925 | -0.271343 | -3.426091 |
| O  | -4.092076 | -0.718382 | -4.279166 |
| C  | -3.317685 | 2.223387  | -1.996829 |
| O  | -3.998675 | 3.176820  | -1.999611 |
| C  | -3.662867 | -0.103180 | -0.588924 |
| O  | -4.535214 | -0.367414 | 0.145148  |
| C  | -2.714260 | 3.213347  | 1.592582  |

|   |           |           |           |
|---|-----------|-----------|-----------|
| C | 0.278402  | 3.805355  | 2.213617  |
| H | -0.257483 | 5.801924  | -0.325926 |
| H | -1.607661 | 6.111110  | 0.793381  |
| H | 2.798035  | 5.080173  | 0.150898  |
| H | 2.116169  | 3.811381  | 1.202105  |
| H | 1.116237  | 5.198770  | 0.723522  |
| H | 1.703094  | 5.556481  | -2.714803 |
| H | 0.010891  | 5.558872  | -2.149850 |
| H | 1.240509  | 4.179171  | 1.831228  |
| H | 3.680172  | 3.220689  | -1.886930 |
| H | 2.949933  | 1.616095  | 3.699266  |
| H | 2.448526  | 2.379310  | 2.164076  |
| H | 7.113451  | -2.540369 | 0.553520  |
| H | 5.054742  | -3.895690 | 0.978237  |
| H | 2.803307  | -2.845180 | 0.754802  |
| H | -1.922986 | 5.387695  | -0.806353 |
| H | 0.006163  | 1.719641  | 2.554053  |
| H | 0.517401  | 1.071894  | 4.138895  |
| H | -0.402218 | 0.039143  | 3.008109  |
| H | 4.654388  | 0.906832  | -0.322784 |
| H | -2.999470 | 3.992789  | 2.321914  |
| H | -2.692227 | 2.251173  | 2.122192  |
| H | -3.499614 | 3.157396  | 0.822916  |
| H | 0.512244  | 4.442797  | -3.443362 |
| H | -0.079979 | 4.517905  | 2.978682  |
| H | 0.455233  | 2.845800  | 2.718219  |
| H | 2.592148  | 2.323624  | -2.977546 |
| H | 2.963282  | 1.678175  | -1.360253 |
| H | 6.907849  | -0.133867 | -0.089815 |
| H | 1.477769  | -1.766727 | 3.036027  |
| H | 2.208643  | -0.719251 | 4.281499  |
| H | 3.176748  | -1.231066 | 2.878632  |
| H | 3.720337  | 1.121332  | 2.167312  |
| H | -0.097050 | -1.330616 | -3.049740 |
| H | 0.872022  | -0.701353 | -4.405336 |
| H | 0.113367  | 0.431957  | -3.248651 |
| H | 3.535533  | -2.020735 | -2.149504 |
| H | 2.645187  | -2.249187 | -3.675595 |
| H | 1.903104  | -2.755508 | -2.135836 |
| H | 2.399832  | 1.461234  | -3.038691 |
| H | 3.793621  | 0.505914  | -2.438207 |
| H | 3.150196  | 0.215523  | -4.077704 |

**Table S11.** Cartesian geometry of **3** at B97-D/6-31G\* level in Angstrom [ $\text{\AA}$ ].

|   |          |           |           |
|---|----------|-----------|-----------|
| C | 4.745750 | -0.141250 | -0.037847 |
|---|----------|-----------|-----------|

|    |           |           |           |
|----|-----------|-----------|-----------|
| C  | 6.012612  | -0.731037 | 0.093721  |
| C  | 6.127349  | -2.082177 | 0.456489  |
| C  | 4.971176  | -2.844674 | 0.695567  |
| C  | 3.704661  | -2.259092 | 0.570691  |
| C  | 3.588250  | -0.904197 | 0.200294  |
| C  | 2.225168  | -0.328450 | 0.036673  |
| N  | 1.418686  | 0.105292  | 1.026649  |
| C  | 1.696530  | 0.339914  | 2.466469  |
| C  | 2.170422  | -0.933373 | 3.201237  |
| N  | 1.517230  | -0.253867 | -1.103887 |
| Si | -0.049748 | 0.196304  | -0.153762 |
| P  | -0.530345 | 2.277483  | -0.897234 |
| Si | 1.066174  | 3.820664  | -0.398376 |
| C  | 0.910692  | 5.220154  | -1.687893 |
| C  | 1.895979  | -0.595191 | -2.500483 |
| C  | 2.538757  | -1.995812 | -2.608876 |
| C  | 2.875848  | 0.470270  | -3.041579 |
| C  | 0.607406  | -0.545913 | -3.348299 |
| W  | -1.859562 | -1.648614 | 0.017351  |
| C  | -2.854217 | -0.581027 | 1.459460  |
| O  | -3.437082 | -0.077316 | 2.339913  |
| C  | 2.772255  | 1.438212  | 2.626633  |
| C  | 0.367000  | 0.822580  | 3.077848  |
| C  | -3.373201 | -2.995162 | 0.110681  |
| O  | -4.258693 | -3.757786 | 0.165310  |
| C  | -0.827707 | -2.618590 | 1.487645  |
| O  | -0.231866 | -3.244217 | 2.279071  |
| C  | -0.896456 | -2.945908 | -1.240687 |
| O  | -0.384402 | -3.767046 | -1.898869 |
| Si | -2.393052 | 3.106953  | 0.127301  |
| C  | -3.944971 | 2.190074  | -0.476275 |
| C  | -2.360773 | 3.131379  | 2.032997  |
| C  | -2.525679 | 4.917081  | -0.477115 |
| C  | 2.825272  | 3.099033  | -0.556688 |
| C  | 0.872009  | 4.605403  | 1.334796  |
| H  | -1.720984 | 5.553233  | -0.076038 |
| H  | -3.488136 | 5.342803  | -0.141737 |
| H  | 1.698920  | 5.314936  | 1.518550  |
| H  | 0.876813  | 3.862913  | 2.147502  |
| H  | -0.072025 | 5.168227  | 1.406141  |
| H  | 1.690910  | 5.982911  | -1.513240 |
| H  | -0.068980 | 5.721221  | -1.643764 |
| H  | -1.536888 | 3.748914  | 2.422194  |
| H  | 3.548908  | 3.817391  | -0.131752 |
| H  | 2.949932  | 1.616096  | 3.699266  |

|   |           |           |           |
|---|-----------|-----------|-----------|
| H | 2.448525  | 2.379311  | 2.164076  |
| H | 7.113452  | -2.540367 | 0.553520  |
| H | 5.054743  | -3.895688 | 0.978237  |
| H | 2.803387  | -2.844407 | 0.757625  |
| H | -2.492754 | 4.980805  | -1.577035 |
| H | 0.006162  | 1.719641  | 2.554053  |
| H | 0.517402  | 1.071894  | 4.138895  |
| H | -0.402218 | 0.039143  | 3.008109  |
| H | 4.654388  | 0.906833  | -0.322784 |
| H | -4.837636 | 2.709127  | -0.083169 |
| H | -3.984032 | 1.148152  | -0.130407 |
| H | -4.006080 | 2.183602  | -1.575603 |
| H | 1.041870  | 4.827108  | -2.709937 |
| H | -3.309111 | 3.565148  | 2.399040  |
| H | -2.273625 | 2.125126  | 2.464850  |
| H | 3.095771  | 2.928738  | -1.609226 |
| H | 2.931795  | 2.151126  | -0.015986 |
| H | 6.907849  | -0.133865 | -0.089815 |
| H | 1.477769  | -1.766727 | 3.036027  |
| H | 2.208644  | -0.719250 | 4.281499  |
| H | 3.176748  | -1.231065 | 2.878632  |
| H | 3.720337  | 1.121333  | 2.167312  |
| H | -0.097050 | -1.330617 | -3.049740 |
| H | 0.872022  | -0.701354 | -4.405336 |
| H | 0.113367  | 0.431956  | -3.248651 |
| H | 3.535534  | -2.020734 | -2.149504 |
| H | 2.645188  | -2.249186 | -3.675595 |
| H | 1.903105  | -2.755507 | -2.135836 |
| H | 2.399831  | 1.461235  | -3.038691 |
| H | 3.793621  | 0.505915  | -2.438207 |
| H | 3.150196  | 0.215524  | -4.077704 |
| C | -2.731221 | -0.746643 | -1.617724 |
| O | -3.203089 | -0.301748 | -2.587834 |

## 6. References

- 1 S. Inoue, W. Wang, C. Präsang, M. Asay, E. Irran, M. Driess, *J. Am. Chem. Soc.*, 2011, **133**, 2868.
- 2 N. C. Breit, T. Szilvási, S. Inoue, *Chem. Eur. J.*, 2014, **20**, 9312.
- 3 G. M. Sheldrick, SHELX-97 Program for Crystal Structure Determination, Universität Göttingen (Germany) 1997.
- 4 M. J. Frisch, J. A. Pople, J. S. Binkley, *J. Chem. Phys.* **1984**, *80*, 3265.
- 5 T. H. Dunning, *J. Chem. Phys.* **1989**, *90*, 1007.
- 6 O. Vahtras, J. Almlöf, M. W. Feyereisen, *Chem. Phys. Lett.* **1993**, *213*, 514.
- 7 A. D. Becke, *J. Chem. Phys.* **1997**, *107*, 8554.
- 8 S. Grimme, *J. Comput. Chem.* **2006**, *27*, 1787.
- 9 A. D. Becke, *J. Chem. Phys.* **1993**, *98*, 5648.
- 10 T. Yanai, D. Tew, N. Handy, *Chem. Phys. Lett.* **2004**, *393*, 51.
- 11 Gaussian 09, Revision B.01, M. J. Frisch, G. W. Trucks, H. B. Schlegel, G. E. Scuseria, M. A. Robb, J. R. Cheeseman, G. Scalmani, V. Barone, B. Mennucci, G. A. Petersson, H. Nakatsuji, M. Caricato, X. Li, H. P. Hratchian, A. F. Izmaylov, J. Bloino, G. Zheng, J. L. Sonnenberg, M. Hada, M. Ehara, K. Toyota, R. Fukuda, J. Hasegawa, M. Ishida, T. Nakajima, Y. Honda, O. Kitao, H. Nakai, T. Vreven, J. A. Montgomery, Jr., J. E. Peralta, F. Ogliaro, M. Bearpark, J. J. Heyd, E. Brothers, K. N. Kudin, V. N. Staroverov, R. Kobayashi, J. Normand, K. Raghavachari, A. Rendell, J. C. Burant, S. S. Iyengar, J. Tomasi, M. Cossi, N. Rega, J. M. Millam, M. Klene, J. E. Knox, J. B. Cross, V. Bakken, C. Adamo, J. Jaramillo, R. Gomperts, R. E. Stratmann, O. Yazyev, A. J. Austin, R. Cammi, C. Pomelli, J. W. Ochterski, R. L. Martin, K. Morokuma, V. G. Zakrzewski, G. A. Voth, P. Salvador, J. J. Dannenberg, S. Dapprich, A. D. Daniels, Ö. Farkas, J. B. Foresman, J. V. Ortiz, J. Cioslowski, and D. J. Fox, Gaussian, Inc., Wallingford CT, 2009.
